# Supplementary material for: HAPLN1 matrikine: a bone marrow homing factor linked to poor outcomes in patients with MM
Source: PubMed Central journal article supplement — Blood Adv. 2023 Sep 1;7(22):6859–72. doi: 10.1182/bloodadvances.2023010139 (PMC10685165; doi:10.1182/bloodadvances.2023010139), 2023-09-01
Supplement: BLOODA_ADV-2023-010139-mmc1.pdf [file BLOODA_ADV-2023-010139-mmc1.pdf]

## Supplemental Methods

### *Cell culture*

RPMI8226 and MM.1S human MM, HMEC-1, HS-5, and 293T cell lines were purchased from the American Tissue Type Culture Collection (Manassas, VA, USA). MM cell lines were cultured at 37°C/5% CO<sub>2</sub> in RPMI-1640 media (Gibco, Rockville, MD, USA) containing 10% fetal bovine serum, 2% GlutaMAX (Gibco, Rockville, MD, USA), 100 U/mL penicillin, and 100 µg/mL streptomycin. HMEC-1 was cultured in MCDB131 media (Gibco, Rockville, MD, USA) containing 10% fetal bovine serum, 2% GlutaMAX, 10 ng/mL epidermal growth factor (EGF), 1 µg/mL hydrocortisone, 100 U/mL penicillin, and 100 µg/mL streptomycin. HS-5 and 293T were cultured in DMEM (Corning, Tewksbury, MA, USA) containing 10% fetal bovine serum, 100 U/mL penicillin, and 100 µg/mL streptomycin. All the cell lines were mycoplasma negative and authenticated by short tandem repeat (STR) genotyping.

### *Purification of maltose-binding protein (MBP)-tagged proteins*

Purification of MBP-PTR1 and MBP proteins was done as described in De Bakshi et al<sup>1</sup>. Briefly, the cDNA sequence encoding the HAPLN1-PTR1 domain (aa 159-253) was inserted into pET28-MBP-TEV plasmid in frame with and downstream of the MBP coding sequence and the resulting plasmid was transformed into the BL21 Rosetta 2 *Escherichia coli* strain. Proteins were induced with 1 mM IPTG followed by purification using amylose resin and elution by 50 mM maltose. To remove potential LPS contamination, the eluted protein fraction was run through Pierce High-Capacity Endotoxin Removal Spin Columns (Thermo Scientific, Waltham, MA, USA) according to the manufacturer's instruction. The

LPS-removed protein fraction was further processed by fast protein liquid chromatography (FPLC) using a size exclusion column, Superose 6 Increase 10/300 GL (Sigma-Aldrich, St. Louis, MO, USA) to obtain highly purified, monomeric and functional recombinant HAPLN1-PTR1 domain. The purity of the protein fragment was assessed by SDS-PAGE analysis and Coomassie staining and the functional activity was ensured by assessing NF- $\kappa$ B activation in MM cell lines via electrophoretic mobility shift assay (EMSA) as described previously<sup>2</sup>. Cells were treated with either 100 nM MBP-PTR1 or MBP alone, unless indicated otherwise.

#### *Adhesion assay*

The glass plates (6 mm diameter well) coated with fibronectin (FN, 10  $\mu$ g/mL) or plated with a confluent monolayer of cells (HMEC-1, HS-5) were prepared one day before assaying for MM cell adhesion. Fibronectin-coated plates were blocked with 1% BSA/PBS for 1 hour. MM cells were pre-stained with CFSE (Thermo Scientific, Waltham, MA, USA) according to the manufacturer's instruction and plated on the glass plate (50,000 cells/well in 1% BSA RPMI1640 media) and incubated for 2 hours at 37°C. After incubation, non-adherent MM cells were washed with PBS twice and fixed with 4% paraformaldehyde. The plates were imaged, and cell number was counted by ImageJ software.

#### *Transwell migration assay*

The bottom chambers of Transwell filter chambers (5  $\mu$ m pores; Corning, Tewksbury, MA, USA) were coated with 10  $\mu$ g/ml of FN as described previously<sup>3</sup>. Cells ( $5 \times 10^5$  and  $1 \times$

$10^5$  for RPMI8226 and MM.1S, respectively) were pre-stained with CFSE (Thermo Scientific, Waltham, MA, USA) according to the manufacturer's instruction and placed in the upper chamber in 1% BSA RPMI1640 media and incubated for 16 hours at 37 °C. In the bottom chamber, chemoattractants were added in 1% BSA RPMI1640 media. Cells on the bottom of the filter were fixed, and four fields were imaged, and the cell number was counted by ImageJ software. For the co-culture of HS-5 and MM cells, HS-5 cells ( $5 \times 10^4$  cells/24-well) were plated in the bottom chamber one day before the migration assay. The media was changed with 1% BSA RPMI1640 media and the Transwell inserts were assembled for the assay.

#### *$\mu$ -Slide time-lapse migration assay*

The time-lapse migration assays were performed with  $\mu$ -Slide Chemotaxis (Ibidi GmbH, Planegg, Germany) following the manufacturer's instruction. Briefly, RPMI8226 cells were plated in the complete media in the channel. In the reservoir, the final concentration of 30 nM of MBP or MBP-PTR1 was filled. Images were taken every 10 minutes for 16 hours using a Nikon Eclipse Ti Inverted Microscope (Nikon, Tokyo, Japan) equipped with a CO<sub>2</sub>- and temperature-controlled chamber. Images were imported as stacks to ImageJ software and analyzed with the ImageJ plugins, Manual Tracking, and the Chemotaxis and Migration Tools. Individual cells moving at least one cell length were tracked at each cell position in the field throughout the temporal stacks, until the cell could no longer be tracked, e.g., moving out of frame. Calculations of the forward migration index parallel (FMI<sup>||</sup>) or perpendicular (FMI<sup>⊥</sup>) to the chemotactic gradient were as following<sup>4,5</sup>.

$$FMI^{||} = \frac{1}{n} \sum_{i=1}^n \frac{y_{i,end}}{d_{i,accum}}$$

$$FMI^+ = \frac{1}{n} \sum_{i=1}^n \frac{x_{i,end}}{d_{i,accum}}$$

(i = index of single cells, n = number of cells,  $x_{i,end}$ ,  $y_{i,end}$  = coordinates of the cells' endpoints,  $d_{i,accum}$  = accumulated distance of the cells' paths)

#### *Generation of stable HS-5 cells secreting HAPLN1 matrikine*

The cDNA sequence encoding the HAPLN1 fragment (aa 32-354) was inserted into the pSecTag2A (Invitrogen, San Diego, CA, USA) plasmid in frame with the N-terminal Igk chain leader sequence for protein secretion and the C-terminal *c-Myc* epitope and 6×His tag. The integrity of the resulting construct was sequence verified. HS-5 cells were transfected with pSecTag2A empty vector (EV) or pSecTag2A-HAPLN1-32-354 by Nucleofector kit (Lonza, Walkersville, MD, USA). The cells were treated with 100 µg/mL Zeocin (Thermo Scientific, Waltham, MA, USA) and the stable clones (HS-5/EV and HS-5/H1) were selected by limited dilution and clonal expansion. HAPLN1 knockdown cells were generated by shHAPLN1 (SHCLNG-NM\_001884, Sigma-Aldrich, St. Louis, MO, USA) transduction and selected with puromycin.

#### *Western blot (WB) analysis of conditioned media (CM) and cell extracts*

CM was prepared by culturing a confluent monolayer of HS-5 cells, in serum-free DMEM at 37°C. After 48-72 hours, the CM was removed and centrifuged at 13,000 g for 5 minutes to remove cellular debris. The secreted protein was precipitated by adding 50 µl of 100% trichloroacetic acid (TCA) and 50 µl of 2% deoxycholate (DOC) into 0.5 mL CM and centrifuged at 13,000 g for 10 minutes. The pellet was solubilized with 1 M Tris buffer (pH 8.8) and run on denaturing 12.5% SDS-PAGE gel. Dilutions of recombinant human

HAPLN1 protein (2608-HP, R&D Systems, Minneapolis, MN, USA) were used for quantification standards. Cell extracts were made using TOTEX buffer, as described previously<sup>7</sup>. Equal amounts of soluble protein were run on denaturing 7.5% SDS-PAGE gel and transferred onto a polyvinylidene fluoride (PVDF) membrane (Millipore, Bedford, MA, USA). The membrane was then incubated with the appropriate antibodies. Antibodies used for the CM were against Myc-tag (clone 9E10, Santa Cruz, Dallas, TX, USA) and HAPLN1 (MAB2608, R&D Systems, Minneapolis, MN, USA). Primary antibodies to pSTAT1 (9167), pSTAT3 (9145), STAT1 (9172), and STAT3 (9139) were purchased from Cell Signaling Technology (Danvers, MA, USA), tubulin from Millipore (DM1A, Bedford, MA, USA) and actin from Sigma-Aldrich (A5441, St. Louis, MO, USA). Immunoblots were analyzed by enhanced chemiluminescence as described by the manufacturer (GE Healthcare, Chicago, IL, USA).

#### *ELISA of HAPLN1 in HS-5 cell conditioned media*

Pierce® Streptavidin Coated 96-well Plates (15120, Thermo Fisher Scientific, Waltham, MA, USA) were coated with 4 µg/mL biotinylated anti-HAPLN1 antibody (BAF-2608, R&D Systems, Minneapolis, MN, USA) overnight at 4°C. The plates were washed 3 times with TBS containing 0.05% Tween-20 and blocked with 3% BSA for 1 hour. After washing, the samples were incubated overnight at 4°C. Next day, the plates were washed and incubated with 2 µg/mL detection antibody (MAB-2608, R&D Systems, Minneapolis, MN, USA), for 0.5 hour at room temperature. Plates were washed and incubated with secondary anti-mouse HRP-conjugated antibody (95017-332, Cytiva, Marlborough, MA, USA) diluted 1:5,000 for 0.5 hour. After washing, TMB (34028, Thermo Fisher Scientific,

Waltham, MA, USA) was added to the plates and incubated for 15 minutes. The reaction was stopped using 1N H<sub>2</sub>SO<sub>4</sub>, and absorbance was measured at 450 nm. Dilutions of recombinant human HAPLN1 protein (2608-HP, R&D Systems, Minneapolis, MN, USA) were used for quantification standards.

#### *Immunohistochemistry (IHC) analysis*

Mouse tibiae were fixed in 10% formalin-buffered saline and decalcified. The tissue was paraffin-embedded and sectioned. Sections were deparaffinized in xylene and rehydrated in graded alcohols, and the epitope was retrieved by boiling in citrate buffer (pH 6.0; Vector Laboratories, Burlingame, CA, USA) for 20 minutes. Immunohistochemistry was performed using antibodies against CD138 (clone B-A38, Bio-Rad, Hercules, California, USA) and HLA class 1 ABC (ab225636, Abcam, Cambridge, UK) with the secondary anti-rabbit (Alexa Fluor<sup>®</sup> 647 Conjugate; CST4414, Cell Signaling Technology, Danvers, MA, USA) and anti-mouse (Alexa Fluor<sup>®</sup> 488 Conjugate; CST4408, Cell Signaling Technology, Danvers, MA, USA) antibodies. The TrueVIEW Autofluorescence Quenching kit (Vector Laboratories, Burlingame, CA, USA) was used according to the manufacturer's instruction before mounting.

#### *Single-cell cloning of MM cells*

Luciferase-labeled MM.1S cells or STAT1 knockdown MM.1S cells were generated by lentiviral transduction. The lentiviral particle was packaged by transfecting pLenti CMV Puro LUC (w168-1)<sup>11</sup>, MISSION pLKO.1-shSTAT1, (TRCN0000004267) or MISSION pLKO.1-puro Control Vector (SHC001, Sigma-Aldrich, St. Louis, MO, USA), with

packaging plasmids (pCMV-dR8.91, and pCMV-VSV-G) to 293T cells. pLenti CMV Puro LUC (w168-1) was a gift from Eric Campeau and Paul Kaufman (Addgene plasmid #17477). MM.1S cells were spininfected for 60 minutes at 1,200 g in the presence of 8 µg/mL polybrene. Transduced cells were selected with puromycin, and the stable clone was selected by limited dilution and clonal expansion. RPMI8226 STAT1 and STAT3 knockout CRISPR/Cas9-edited cell pools were purchased from Synthego Corporation (Redwood City, CA, USA). STAT1 and STAT3 knockout cell clones were generated by limited dilution and clonal expansion.

#### *Quantitative PCR analysis*

Total RNA and genomic DNA from samples were purified by Trizol (Invitrogen, San Diego, CA, USA) according to the manufacturer's instruction. cDNAs were synthesized from the total RNAs using iScript cDNA synthesis kit (Bio-Rad, Hercules, California, USA). QPCR was performed and analyzed using a Bio-Rad CFX Connect real-time system. The absolute copy number of *luciferase* gene was determined by the standard curve using serial dilutions of the plasmids (pLenti CMV Puro LUC w168-1) as quantification standards for *luciferase*. The human-specific primer pair for *HAPLN1* was designed to target the PTR1 domain of HAPLN1. The primer sequences were Luciferase (forward, TGATTACACCCGAGGGGGAT; reverse, CTCACACACAGTTCGCCTCT), HAPLN1 (forward, TCTCAATTTTCACGAGGCGC; reverse, GCTCTCTGGGCTTTGTGATG), SMA (forward, GTGTTGCCCTGAAGAGCAT; reverse, GCTGGGACATTGAAAGTCTCA), STAT1 (forward, CTAGTGGAGTGGAAGCGGAG; reverse, CACCACAAACGAGCTCTGAA), STAT3 (forward, CCTCTGCCGGAGAAACAG;

reverse, AACACCAAAGTGGCATGTGA), CD44 (forward, TGGCACCCGCTATGTGCGAG; reverse, GTAGCAGGGATTCTGTCTG), SDF-1 (forward, TCAGCCTGAGCTACAGATGC ; reverse, CTTTAGCTTCGGGTCAATGC), and ICAM-1 (forward, GGCCGGCCAGCTTATACAC; reverse, TAGACACTTGAGCTCGGGCA).

#### *Mining Algorithm for Genet/c Controllers (MAGIC) analysis*

Differentially expressed genes between GST and GST-PTR1 samples<sup>13</sup> were passed through MAGIC<sup>14</sup> using default settings. Predicted transcription factors and coregulators were ordered by Score and graphed.

#### *STAT1/3-dependent luciferase reporter assay*

RPMI8226 cells were transiently transfected with Cignal STAT3 Reporter Kit (CCS-9028L, Qiagen, Hilden, Germany) using Lipofectamine 2000 (Invitrogen, San Diego, CA, USA). The transfected cells were split into a 24-well plate 48 hours after transfection to control for the same transfection efficiency and treated with 100 nM MBP or MBP-PTR1 or 50 ng/mL IL-6 for 24 hours. Cell extracts were incubated with luciferin in a white 96-well plate, and the luminescence was measured by ENSPIRE plate reader (Perkin Elmer, Waltham, MA, USA).

#### *Electrophoretic mobility shift assay (EMSA) and supershift assay*

EMSAs to measure STAT1/3 activity in MM cells were performed using <sup>32</sup>P-labeled double-stranded DNA probes with the following sequences: 5'-GTCGACATTTCCCGTAAATCGTCGA-3'. Cell extracts were made using TOTEX buffer



as described before<sup>2</sup>, and extracts were separated on 4% native polyacrylamide gel, dried, and exposed to a phosphor screen (Amersham Biosciences). For super shift assays, 1  $\mu$ L of anti-STAT1 or anti-STAT3 antibody (9172, 9139, Cell Signaling Technology, Danvers, MA, USA) was added to the cell extract reaction mixture before probes were added.

#### *RNA-sequencing transcriptome analysis*

RPMI8226 WT and STAT1 KO clone were treated with 100 nM MBP or MBP-PTR1 for 6 hours in 3 biological replicates run on 3 separate days (GSE237216). The frozen pellets were shipped on dry ice to Genewiz/Azenta (South Plainfield, NJ, USA) for RNA sequencing, RNA extraction, sample QC, library preparations, and sequencing reactions. Briefly, total RNA was extracted using Qiagen RNeasy Plus Universal kit (Qiagen, Hilden, Germany) following the manufacturer's instructions. The RNA sequencing library was prepared using the NEBNext Ultra II RNA Library Prep Kit (New England Biolabs, Ipswich, MA, USA) for Illumina using manufacturer's instructions. Raw sequence data generated from Illumina HiSeq. Reads were aligned to the Homo sapiens GRCh38 reference genome by STAR. Differential expression was analyzed using DESeq2 using count values and Likelihood Ratio Test<sup>15</sup>. Genes with an adjusted P value ( $P_{adj}$ ) of  $<0.05$  were subjected to Leiden Clustering with a resolution of 1.0 using custom Python scripts utilizing the leiden tool in Scanpy (PMID: 29409532)<sup>16,17</sup>. For each cluster, the mean expression and standard deviation were plotted per condition. Enrichment score shown in Figure 4D were calculated as follows. First, gene lists associated with each pathway in the KEGG database were compared to the list of genes upregulated with MBP-PTR1.

Fisher Exact tests for the overlap between lists were performed using custom Python scripts. On a cartesian plot of  $\log_{10}(\text{Odds ratio})$  vs confidence ( $-\log_{10}(P \text{ adj})$ ), the Enrichment Score is calculated as the Pythagorean distance from the origin to each data point on the plot:

$$\text{Score} = \sqrt{\log(\text{Odds})^2 + \text{confidence}^2}$$

#### *HAPLN1 AlphaLISA assay on patient BM plasma fractions*

Bone marrow (BM) aspirates from MM patients were obtained in accordance with the University of Wisconsin-Madison Institutional Review Board requirements (HO07403). Cytogenetic risk was assessed by fluorescence *in situ* hybridization (FISH). The plasma layer of patient BM aspirates was subjected to an amplified luminescent proximity homogenous assay-linked immunosorbent assay (AlphaLISA). First, the IgG level in each BM sample was measured using the Human IgG ELISA kit (BMS2091, Invitrogen, San Diego, CA, USA) following the manufacturer's protocol, with the dilution factor of 1,500,000. Plasma samples were diluted 50 times in PBS and final IgG level was adjusted by adding human IgG isotype control (31154, Invitrogen, San Diego, CA, USA) to match the highest IgG concentration among all the samples analyzed. The balancing of total IgG was necessary because preliminary study indicated that IgG was negatively interfering with AlphaLISA assay (data not shown). The standard was prepared by serial dilutions of recombinant HAPLN1 (10323-H08H, Sino Biological, Beijing, China) with standard diluent (FBS diluted 50 times in PBS with human IgG isotype control added to match the highest IgG concentration among the samples). The cross-reactivity was tested using recombinant HAPLN3 (H00145864-P01, Abnova, Taipei, Taiwan). The assay was

performed using assay buffer (25 mM HEPES, 0.5% BSA, 0.5% Triton X-100, 1 µg/mL Dextran) at room temperature. Diluted patient samples (5 µL) were incubated with 7.5 ng each of 2 primary anti-HAPLN1 antibodies, BAF2608 (R&D systems, Minneapolis, MN, USA) and HPA019105 (Sigma-Aldrich, St. Louis, MO, USA) for 30 min (15 µL total volume). The secondary rabbit IgG acceptor bead (6760002S, Perkin Elmer, Waltham, MA, USA), 1 µg in 10 µL assay buffer, was added and incubated for 1 hour. Subsequently, the streptavidin donor bead (AL159C, Perkin Elmer, Waltham, MA, USA), 1 µg in 25 µL assay buffer, was added, and after 30 min, the samples were measured by ENSPIRE plate reader (Perkin Elmer, Waltham, MA, USA).

#### *The CoMMpass study data*

From the IA17 CoMMpass dataset, patients were divided into two groups based on their STAT1 mRNA levels using a TPM cut-off value of 96. The Kaplan-Meier progression-free survival (PFS) curve for the STAT1 high group (n=48) and the low group (n=47) was plotted from the Multiple Myeloma Research Foundation Researcher Gateway. These data were generated as part of the Multiple Myeloma Research Foundation Personalized Medicine Initiatives using the Genospace Population Analytics platform (<https://research.themmr.org> and [www.themmr.org](http://www.themmr.org)).

#### *Statistical analysis*

Statistical analysis was performed using the two-tailed Student's *t*-test. For the analysis of time-lapse microscopy, the two-tailed Mann-Whitney test was used. The log-rank test was used for the Kaplan-Meier survival curve. A P-value of <0.05 was considered

statistically significant. The analysis was performed with GraphPad Prism 9 Software (GraphPad Software Inc., La Jolla, CA, USA).

# Supplemental Figure 1

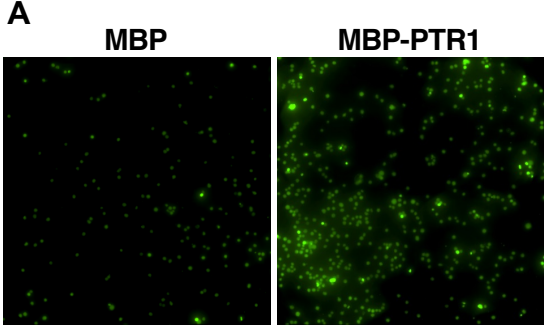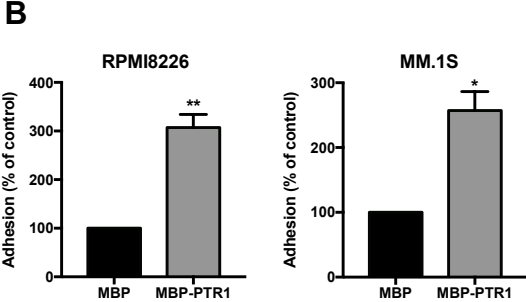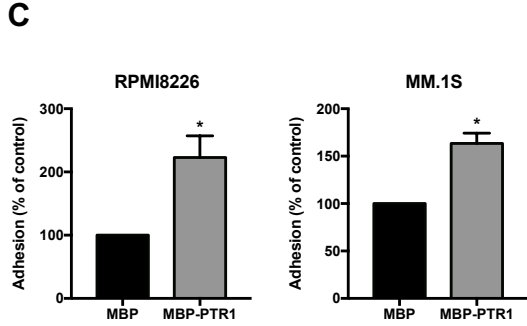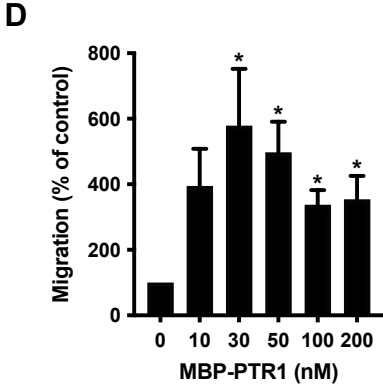

**Supplemental Figure 1. HAPLN matrikine increases MM cell adhesion and migration.** (A) Microscopy images of RPMI8226 cells adhered to fibronectin-coated plates following incubation with MBP or MBP-PTR1 at 100 nM for 16 hours. (B) Graphs depicting %adhesion of RPMI8226 and MM.1S MM cell lines in response to MBP or MBP-PTR1 (100 nM) normalized to MBP control being set as 100%. (C) Graphs depicting %adhesion of RPMI8226 and MM.1S MM cell lines adhering to endothelial cells (HMEC-1). MM cells were incubated with MBP or MBP-PTR1 at 100 nM for 16 hours prior to the adhesion assay. (D) Graphs depicting %migration of RPMI8226 MM cell lines in response to indicated MBP-PTR1 concentrations in the lower Transwell compartment with the control (0 nM) set as 100%. Experiments were independently repeated 4 times for (B, left) and 3 times for (B, right, C and D). Data are expressed as means  $\pm$  SEM. \*,  $p < 0.05$ ; \*\*,  $p < 0.01$ .

# Supplemental Figure 2

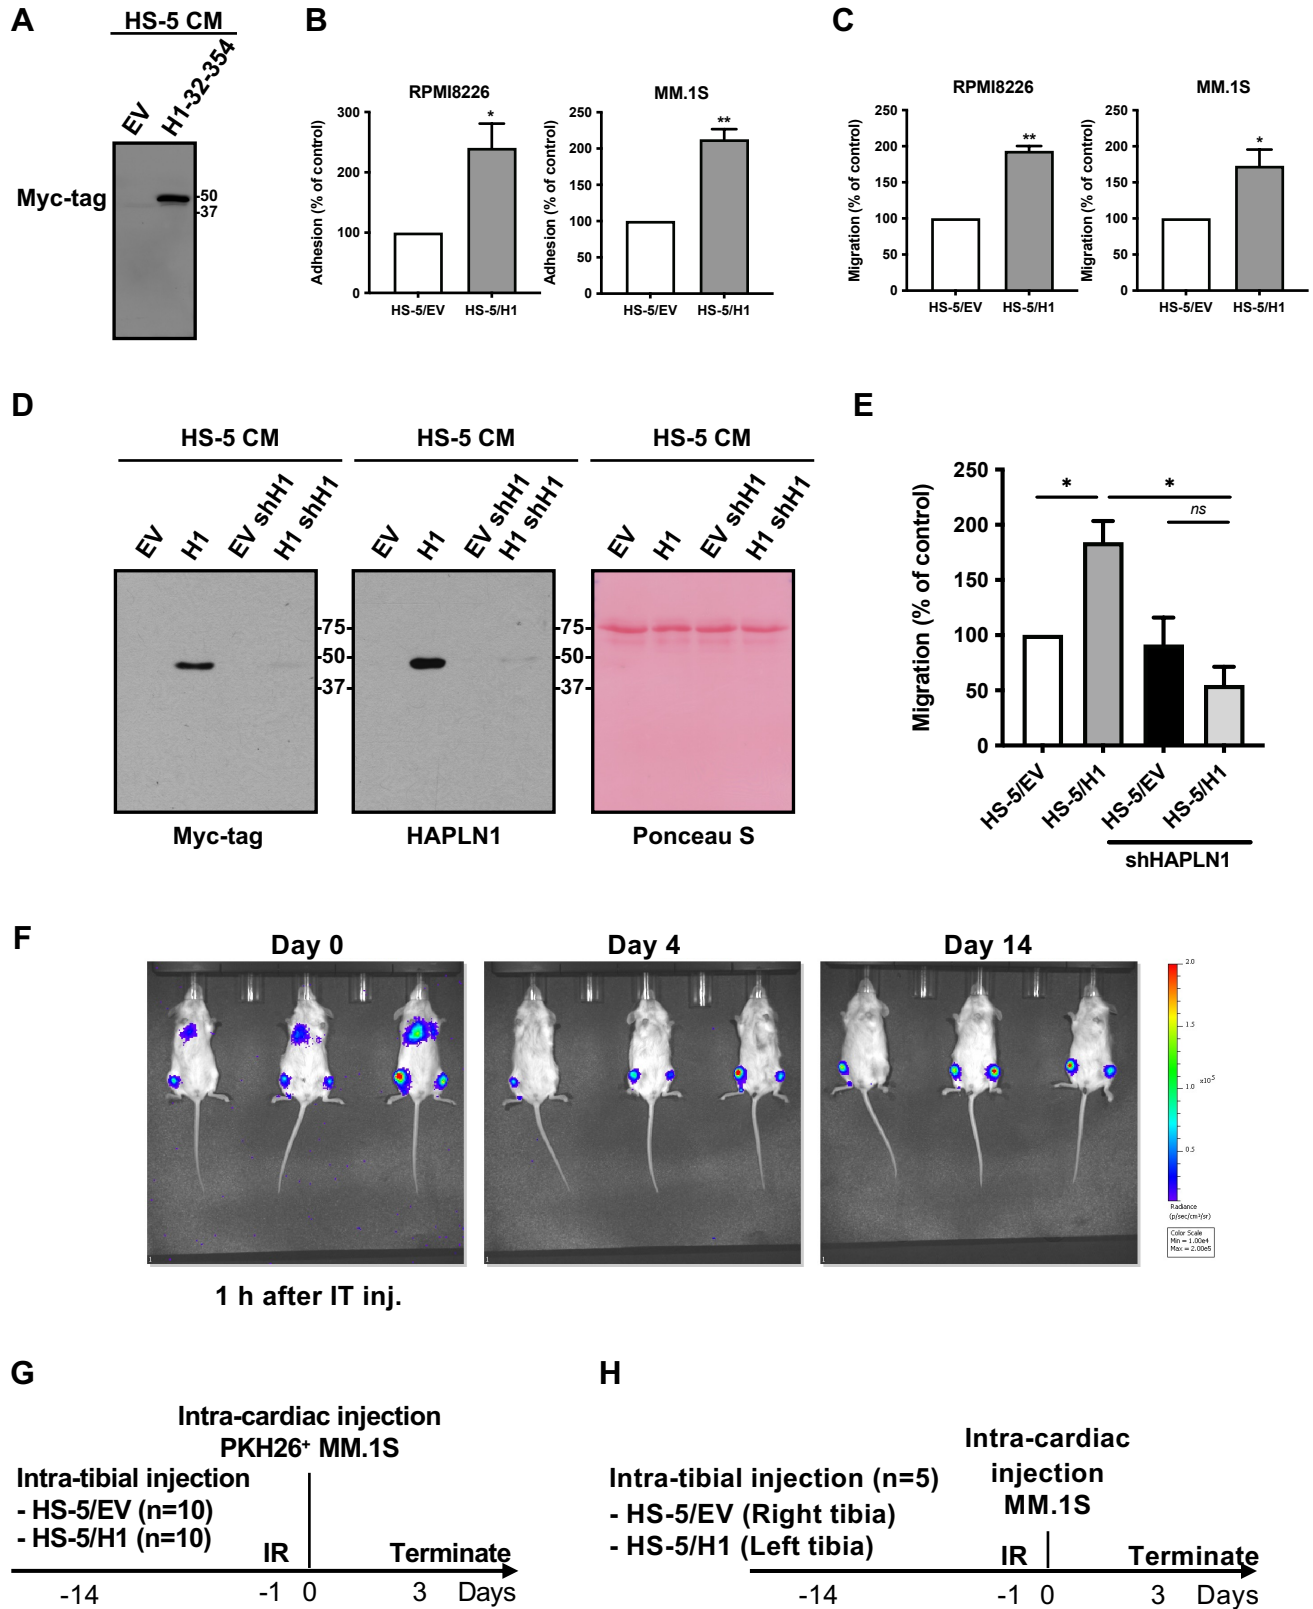

**Supplemental Figure 2. MM cells adhere and migrate towards BMSCs secreting**

**HAPLN1 matrikine.** (A) Western blot analysis of the conditioned media (CM) of HS5/EV and HS-5/H1 cells using anti-Myc-tag antibody. (B) Graphs showing %adhesion of RPMI8226 and MM.1S MM cell lines to HS-5/EV or HS-5/H1 cells with control HS-5/EV cells set as 100%. (C) Graphs showing %migration of RPMI8226 and MM.1S MM cell lines towards HS-5/EV or HS-5/H1 cells in the bottom Transwell chamber with the HS-5/EV group set as 100%. (D) Western blot analysis of the CM of HS5/EV, HS-5/H1 and HAPLN1 knockdown HS-5 cells using anti-Myc-tag and anti-HAPLN1 antibodies. The Ponceau S stain is shown as a loading control. (E) Graphs showing %migration of RPMI8226 cells to HS5/EV, HS-5/H1 and HAPLN1 knockdown HS-5 cells in the bottom of Transwell chambers with the HS-5/EV group set as 100%. (F) Validation of BMSC intra-tibial (IT) injection. Luciferase-labeled HS-5 cells were injected via the intra-tibial route and imaged by IVIS on indicated days. On Day 0, 1 h after the IT injection, the cells were detected in the tibia and chest area, indicating the injection was rightly done in the bone marrow partially entering the systemic circulation. On Day 4 and 14, the majority of the cells were detected in the tibia and absent in chest areas. Of note, the first mouse was injected only in one leg showing that the majority of the injected cells remained within the injection site. (G) The experimental scheme for Figure 2A-B is depicted. IR refers to sublethal whole-body irradiation at 3 Gy. (H) The experimental scheme for Figure 2C-D is depicted. All experiments were independently repeated 3 times for (B and C, left) and 4 times for (C, right). Data are expressed as means  $\pm$  SEM. \*,  $p < 0.05$ ; \*\*,  $p < 0.01$ .



# Supplemental Figure 3

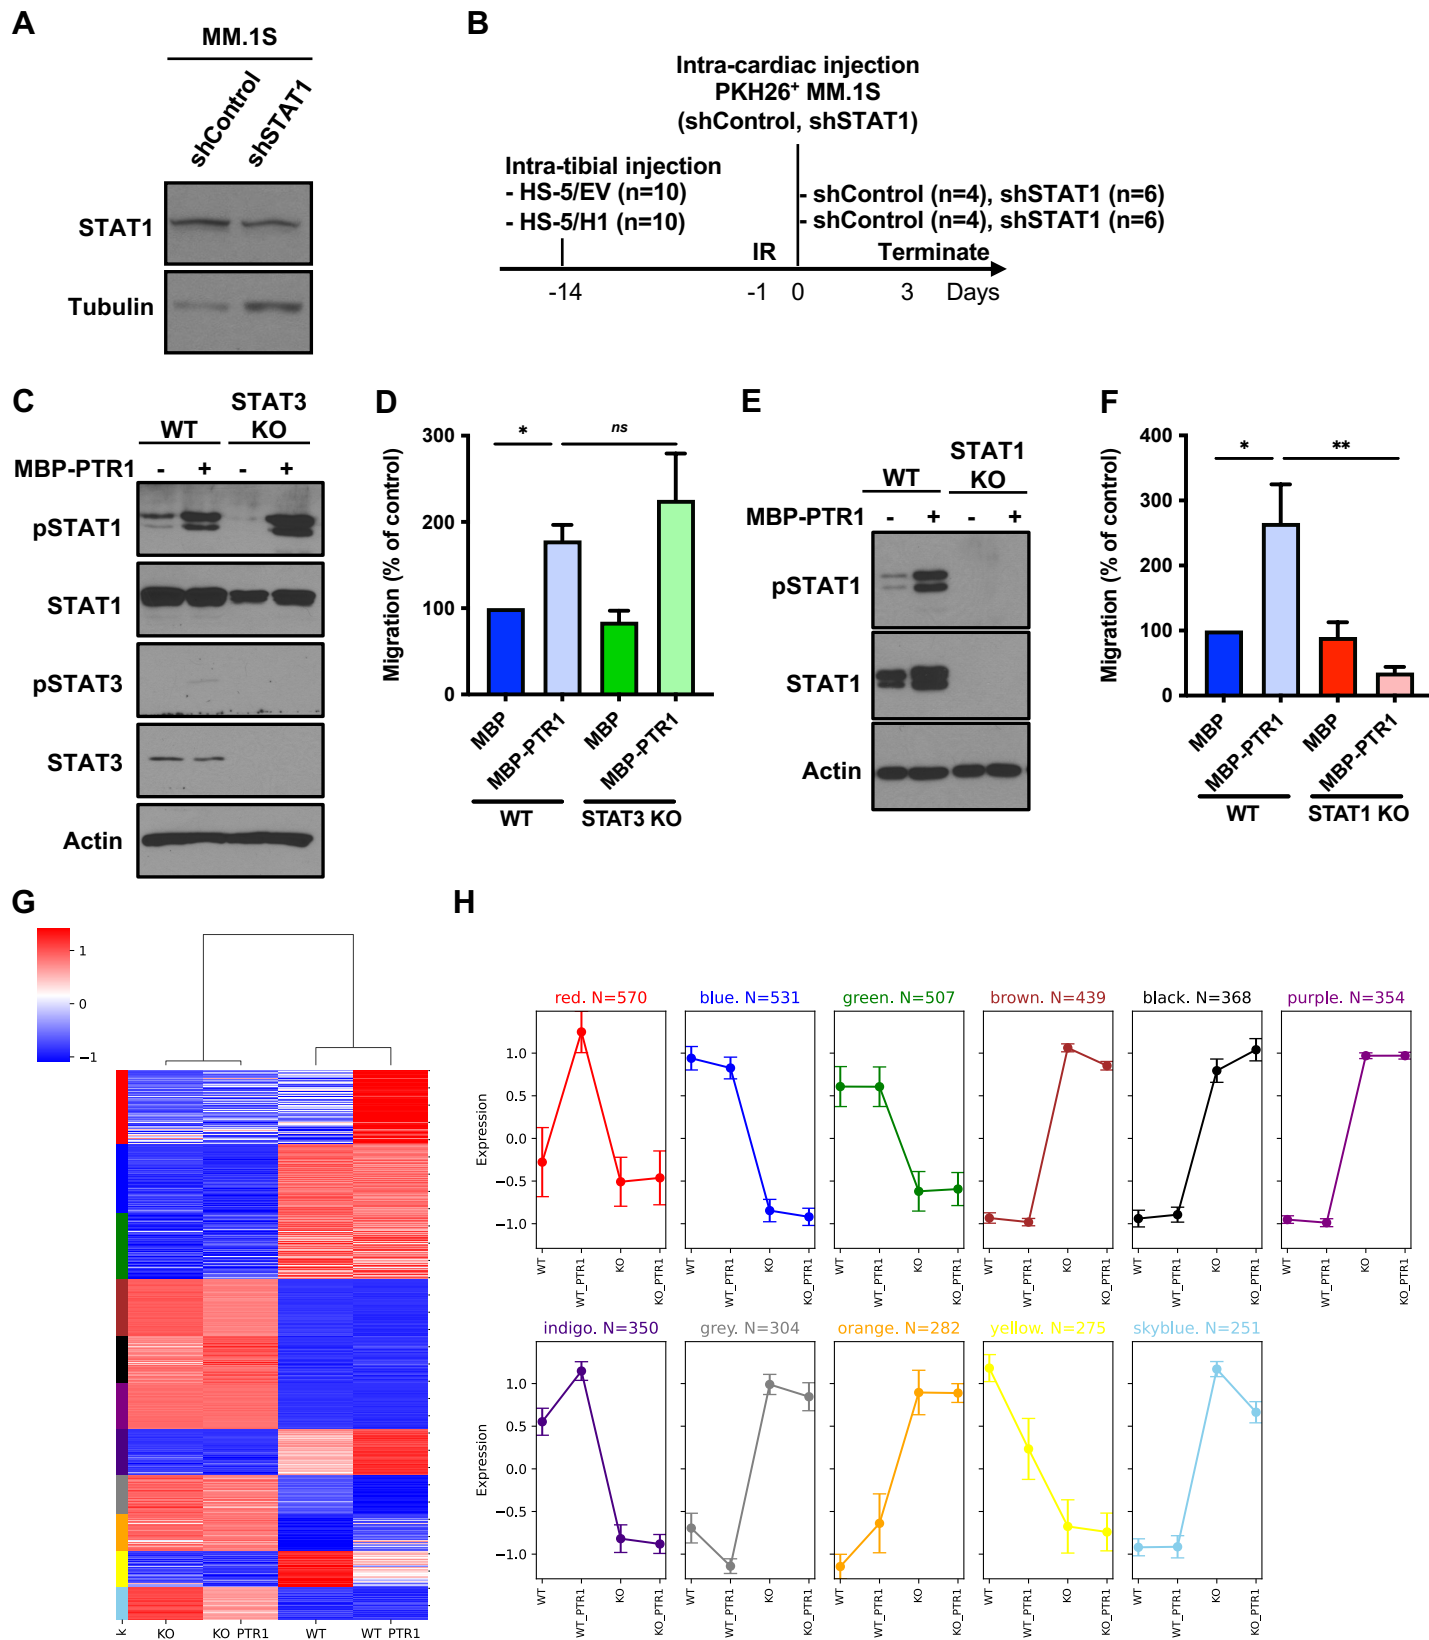

**Supplemental Figure 3. STAT1 is required for HAPLN1 matrikine-induced MM cell migration.** (A) Representative Western blot analysis on MM.1S shControl and shSTAT1 clones probed with STAT1 and tubulin antibodies. (B) The experimental scheme for Figure 4B is depicted. (C) Representative Western blot analysis of indicated proteins in RPMI8226 WT and STAT3 KO cells treated with 100 nM of MBP or MBP-PTR1 for 6 hours. (D) Graphs depicting %migration of RPMI8226 WT and STAT3 KO cells in response to MBP or MBP-PTR1 (100 nM) with MBP treated WT being set as 100%. The graph depicts the mean  $\pm$  SEM of the quantification of 3 independent experiments. (E) Representative Western blot analysis of indicated proteins in RPMI8226 WT and STAT1 KO cells treated with 100 nM of MBP or MBP-PTR1 for 6 hours. (F) Graphs depicting %migration of RPMI8226 WT and STAT1 KO cells in response to MBP or MBP-PTR1 (100 nM) with MBP treated WT being set as 100%. The graph depicts the mean  $\pm$  SEM of the quantification of 3 independent experiments. (G) Heat map of the cluster analysis on differentially expressed genes from the RNA-seq data. (H) Summarized bar graphs showing the 11 clusters. Data are expressed as means  $\pm$  SD.

# Supplemental Figure 4

**A**

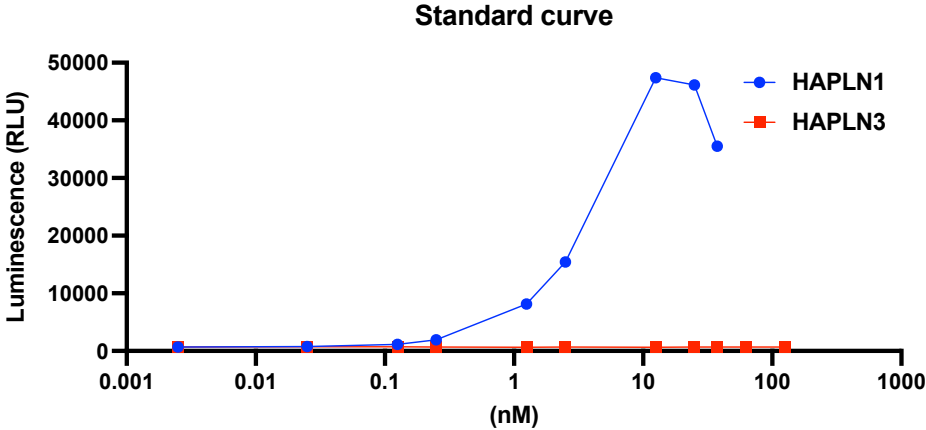

**B**

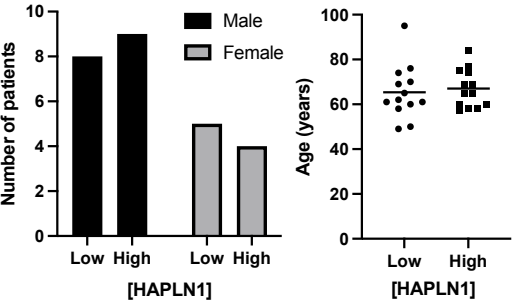

**C**

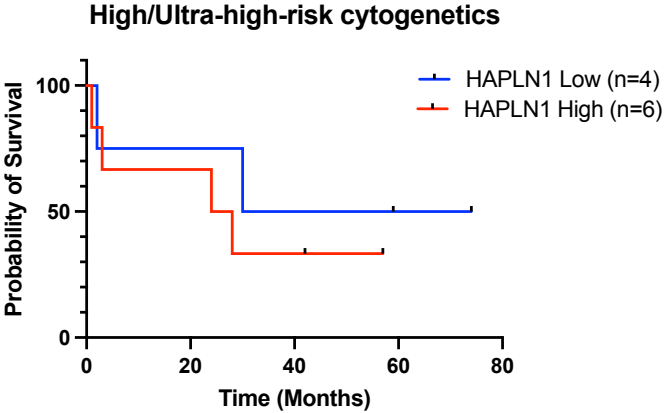

**Supplemental Figure 4. Validation of the AlphaLISA specificity and NDMM patient distribution and outcomes.** (A) The standard curve of recombinant HAPLN1 and HAPLN3 by AlphaLISA. Minimal cross-reactivity to HAPLN3 was observed in the assay condition even at a 10x excess concentration. (B) Graph depicting the distribution of sex and age in the HAPLN1 high and low patient groups in Table 1 and Figure 6A. (C) Kaplan-Meier PFS curve of high/ultra-high cytogenetic risk patients (n=10) separated by HAPLN1 levels.

## Supplemental Tables

**Supplemental Table 1. List of transcription factors driving genes induced by HAPLN1 matrikine in RPMI8226 MM cells as detected by the MAGIC analysis.**

| <i>Factor</i> | <i>Critical ChIP</i> | <i>KS statistic</i> | <i>Obs Tail Mean</i> | <i>Exp Tail Mean</i> | <i>Tail Enrichment</i> | <i>Raw p</i> | <i>Corrected p</i> | <i>Score</i> |
|---------------|----------------------|---------------------|----------------------|----------------------|------------------------|--------------|--------------------|--------------|
| <b>NFKB</b>   | 6.54530669           | 0.2807431           | 35.1815127           | 41.7137979           | 11.7715788             | 5.4838E-39   | 2.7419E-37         | 430.391889   |
| RAD21         | 4.30659814           | 0.11932018          | 10.1861354           | 11.0218637           | 25.3766696             | 2.1641E-07   | 7.7288E-07         | 155.099407   |
| EBF1          | 7.8215516            | 0.15116738          | 25.7923094           | 31.3995508           | 10.1996429             | 1.3202E-11   | 1.1002E-10         | 101.573573   |
| <b>STAT3</b>  | 7.78945995           | 0.14549345          | 29.1684577           | 36.3924389           | 9.07545231             | 8.7938E-11   | 5.4962E-10         | 84.0381563   |
| EZH2          | 3.234928             | 0.19419403          | 27.836516            | 42.5649865           | 4.77996018             | 7.085E-19    | 1.1808E-17         | 80.914256    |
| PU1           | 5.1502342            | 0.12640798          | 21.2137543           | 26.3001862           | 9.34131066             | 3.0418E-08   | 1.3827E-07         | 64.0747377   |
| BCL11A        | 6.04573148           | 0.19510129          | 34.7097976           | 60.9969861           | 3.64081475             | 4.7592E-19   | 1.1898E-17         | 61.6190477   |
| SMC3          | 4.68696292           | 0.11820601          | 15.9878211           | 19.7357555           | 9.5315373              | 2.9157E-07   | 9.7191E-07         | 57.3071583   |
| IKZF1         | 13.3526104           | 0.16147157          | 61.5964912           | 92.132544            | 5.03434535             | 3.5034E-13   | 4.3792E-12         | 57.1831243   |
| NFIC          | 5.25073471           | 0.15884057          | 24.0940542           | 36.9950302           | 4.7352297              | 9.0533E-13   | 9.0533E-12         | 52.2920499   |
| BATF          | 5.32278254           | 0.11676896          | 30.2658432           | 41.3692402           | 6.45163667             | 4.2654E-07   | 1.3329E-06         | 37.9046079   |
| BCL3          | 6.74636988           | 0.15027822          | 31.9802883           | 54.6122743           | 3.82611419             | 1.7856E-11   | 1.2754E-10         | 37.8569144   |
| RUNX3         | 6.88436818           | 0.08940377          | 16.8522973           | 20.3122718           | 10.7412841             | 0.00024567   | 0.00058492         | 34.7255065   |
| ATF2          | 7.69754014           | 0.12822033          | 25.6187728           | 40.4857537           | 4.44639883             | 1.8086E-08   | 9.0432E-08         | 31.318997    |
| FOXM1         | 9.40233713           | 0.12061475          | 27.6756415           | 43.302642            | 4.5420286              | 1.5251E-07   | 5.8658E-07         | 28.3044526   |
| NFATC1        | 10.4608658           | 0.13996331          | 35.5513216           | 70.3858052           | 3.0411568              | 5.2064E-10   | 2.8924E-09         | 25.9676401   |
| POU2F2        | 9.3629058            | 0.11167551          | 31.2612265           | 56.1340636           | 3.51368402             | 1.5822E-06   | 4.6534E-06         | 18.7357747   |
| IRF4          | 7.16202006           | 0.10815998          | 32.0794635           | 56.8426282           | 3.59090176             | 3.7789E-06   | 1.0497E-05         | 17.8788679   |
| MTA3          | 13.7923437           | 0.12081717          | 27.8578708           | 60.7333191           | 2.6947523              | 1.4434E-07   | 6.0142E-07         | 16.7635813   |
| CTCF          | 3.8769406            | 0.07935412          | 8.98488556           | 12.4032665           | 6.25680765             | 0.00166003   | 0.00345839         | 15.3987952   |
| P300          | 2.77437163           | 0.09329994          | 17.7171732           | 29.2440939           | 4.0740514              | 0.00011017   | 0.00027543         | 14.5035839   |
| TCF3          | 8.40615591           | 0.09397206          | 30.5820316           | 59.3857147           | 3.12348063             | 9.5606E-05   | 0.0002516          | 11.2423342   |
| TCF12         | 5.94150791           | 0.08057992          | 24.7672181           | 41.127701            | 4.0276879              | 0.00133106   | 0.00302513         | 10.1467778   |
| MEF2A         | 6.40152359           | 0.07965557          | 36.4441096           | 61.4131955           | 3.91913847             | 0.00157276   | 0.00341904         | 9.66496958   |
| CEBPB         | 4.80577895           | 0.05654477          | 15.4201692           | 19.9573499           | 7.79724699             | 0.05453822   | 0.08796486         | 8.23148166   |
| MEF2C         | 8.11488021           | 0.07667621          | 49.6025755           | 92.4303226           | 3.31637567             | 0.00265794   | 0.00531588         | 7.54284723   |
| NR3C1         | 7.80499919           | 0.06750732          | 38.5552027           | 61.4993591           | 4.36078626             | 0.01178554   | 0.02182508         | 7.24345863   |
| PAX5          | 5.78318766           | 0.06938323          | 22.7943829           | 39.0947254           | 3.79679802             | 0.0088249    | 0.01697097         | 6.72144621   |
| GATA2         | 6.03194              | 0.0578961           | 23.3087111           | 33.9277113           | 5.39000105             | 0.04581855   | 0.07636425         | 6.02122367   |
| <b>STAT5A</b> | 9.24860609           | 0.0580144           | 34.0913111           | 55.0467494           | 4.25369582             | 0.04511625   | 0.07778665         | 4.71775258   |
| WHIPIGG       | 11.1504468           | 0.05871475          | 22.6731897           | 43.9084243           | 3.13543105             | 0.04114682   | 0.07347647         | 3.5551139    |
| <b>STAT1</b>  | 9.55873538           | 0.0564272           | 91.9662042           | 179.162884           | 3.10939693             | 0.05536037   | 0.08650057         | 3.30522992   |

| <b>Factor</b> | <b>Critical ChIP</b> | <b>KS statistic</b> | <b>Obs Tail Mean</b> | <b>Exp Tail Mean</b> | <b>Tail Enrichment</b> | <b>Raw p</b> | <b>Corrected p</b> | <b>Score</b> |
|---------------|----------------------|---------------------|----------------------|----------------------|------------------------|--------------|--------------------|--------------|
| FOSL2         | 6.30505182           | 0.05111308          | 28.7374882           | 48.1289744           | 3.96392838             | 0.10537763   | 0.15966307         | 3.1584404    |
| GATA3         | 4.76647081           | 0.04636683          | 22.6681247           | 36.526847            | 4.27131523             | 0.17736656   | 0.23968454         | 2.64975298   |
| PRDM1         | 11.7633149           | 0.05097104          | 79.2439249           | 194.289492           | 2.37760936             | 0.10711234   | 0.15751815         | 1.90843427   |
| SUZ12         | 17.9117707           | 0.04947767          | 44.6274849           | 101.768764           | 2.56200512             | 0.12682015   | 0.18117165         | 1.90077663   |
| CTBP2         | 13.1683098           | 0.0474254           | 28.4410465           | 59.8815696           | 2.80919677             | 0.15862874   | 0.22031769         | 1.84550358   |
| ERALPH<br>A   | 3.21758498           | 0.04414241          | 39.28017             | 73.4525153           | 3.29894494             | 0.22237142   | 0.29259397         | 1.76076116   |
| STAT2         | 13.5089439           | 0.04344046          | 86.5307552           | 247.026163           | 2.07829571             | 0.23824257   | 0.30543919         | 1.07047866   |
| FOS           | 3.40643612           | 0.03190816          | 14.1483213           | 27.1649798           | 3.17387915             | 0.61490065   | 0.76862581         | 0.36272689   |
| ZNF217        | 13.1118749           | 0.02802284          | 39.2074186           | 82.1531593           | 2.82590487             | 0.76829368   | 0.93694351         | 0.07993522   |
| JUN           | 4.90573319           | 0.02526052          | 19.2502293           | 32.7699553           | 3.84772477             | 0.86491446   | 1                  | 0            |
| JUNB          | 10.9873312           | 0.02004601          | 34.196361            | 68.4471157           | 2.99682379             | 0.97737302   | 1                  | 0            |
| RXRA          | 19.7756369           | 0.01234603          | 43.7135871           | 120.165459           | 2.14355832             | 0.99999508   | 1                  | 0            |
| BRF2          | 60.3457987           | 0.01171055          | 75.874739            | 459.308529           | 1.39576449             | 0.99999896   | 1                  | 0            |
| HDAC6         | 64.4782257           | 0.00920812          | 84.1928925           | 213.595371           | 2.30125626             | 1            | 1                  | 0            |
| NELFE         | 116.925782           | 0.0089239           | 85.8248167           | 283.754374           | 1.86722587             | 1            | 1                  | 0            |
| NANOG         | 33.3381245           | 0.00870787          | 47.5423245           | 131.385557           | 2.13407661             | 1            | 1                  | 0            |
| POL3          | 369.460895           | 0.0034495           | 53.9453836           | 550.874671           | 1.21711493             | 1            | 1                  | 0            |
| BRF1          | 299.394965           | 0.00412712          | 83.2064894           | 570.288768           | 1.34165271             | 1            | 1                  | 0            |

**Supplemental Table 2. List of genes in the cluster analysis of HAPLN1 matrikine induced genes.**

| Blue      | Green   | Skyblue    | Brown     | Red     | Black     | Yellow  | Orange    | Indigo        | Grey     | Purple   |
|-----------|---------|------------|-----------|---------|-----------|---------|-----------|---------------|----------|----------|
| FAT4      | IFI6    | KCNMB4     | THBS2     | MARCKS  | DDR1      | UGT2B4  | AK4       | PTPRM         | HAVCR2   | ATP9A    |
| RPS4Y1    | PLSCR1  | PRAMEF2    | SIGLEC7   | CD83    | ATP2C2    | SNCAIP  | LIPG      | ZFY           | TMCC2    | IGF2     |
| MEF2C     | LGALS9  | FLNC       | SMYD1     | CXCL10  | WNT5A     | RNF144B | CRTC3     | DIAPH2        | ELFN2    | CDC42EP1 |
| MME       | OAS2    | TJP3       | KIF1A     | CD70    | SCN4B     | TCEAL8  | PTPRK     | EPHA3         | DUSP4    | PCARE    |
| INPP5D    | ERP29   | TGFA       | CLDN1     | ADPRH   | ADARB2    | CYTH4   | ABTB2     | ZC3H12C       | ARHGAP39 | KEL      |
| LINC01612 | SRI     | TPRXL      | LGR4      | MFSD2A  | NXN       | GULP1   | CD59      | SOX4          | RXRA     | SLC13A4  |
| CTNND2    | HLA-F   | MAP7D2     | HABP2     | TNFAIP3 | SLC16A9   | OR2W3   | GJC1      | GJA1          | GPC1     | MATN2    |
| DDIT4L    | STAT1   | TMEM37     | MAMLD1    | TLR7    | LIMS2     | PYCARD  | FARP1     | CYBB          | CLDN3    | BMP5     |
| CDH2      | CCDC112 | SMAD6      | CCBE1     | SIRPA   | ELN       | CRACDL  | FOXP1     | ADAMTS2       | SPTLC3   | MAGEA12  |
| GALNT17   | UBE2J2  | GLI2       | DAB2IP    | TNFSF9  | ATF7IP2   | METRNL  | KIDINS220 | HRH2          | MAL      | FAT1     |
| GALNTL6   | MRPS26  | F13A1      | PYGL      | GAS7    | DPP6      | NT5E    | FN1       | LCP2          | IL17RC   | EDN3     |
| CTAG2     | B4GALT2 | ENTPD8     | TMEM132B  | PTGER4  | LY6H      | VSIR    | ASAP2     | SVIL          | ARHGEF16 | FBLN2    |
| CTNNA3    | COX17   | LAD1       | SLC47A1   | IL10    | ZNF423    | DHCR7   | APLP2     | WWC3          | KRT80    | EPAS1    |
| CDH4      | CHCHD1  | GLDC       | LAPTM4B   | TNIP1   | FAM227A   | SPI1    | SIX4      | CHRM3         | WIP1     | CYP24A1  |
| SLFN13    | OAS3    | ARHGAP22   | SALL1     | CD86    | BIN1      | ACSS2   | IL2RB     | ITPRIPL2      | GTF2IRD1 | SCRN1    |
| GLUL      | HNRNPA1 | GFPT2      | RSPO2     | RIPK2   | FZD6      | ACAT2   | SGMS2     | TFAP2B        | ERMAP    | DMRT3    |
| SHANK2    | TSPAN3  | ST3GAL5    | FREM2     | TFRC    | LINC01679 | ARV1    | ATXN1     | KCNQ3         | NOL4L    | DMTN     |
| SPON1     | CIAO1   | HLTF       | GLI3      | CD40    | PKIG      | EVI2B   | CIZ1      | PRKY          | P3H4     | PCOLCE2  |
| TLR4      | CYCS    | PRXL2A     | HSPG2     | TRAF4   | HOXB9     | PLIN2   | FOXC1     | MIR4527H<br>G | FBLN7    | LAMA3    |
| CD53      | MAGOHB  | CLEC18B    | SYT12     | DENND4A | AGAP14P   | SS18L2  | NHLRC2    | EYA2          | H1-0     | ALX4     |
| UTRN      | ACLY    | GSC        | RASL11A   | CDKN1B  | CDCP1     | TNFSF4  | SFTPA2    | ROBO1         | ZER1     | CD177    |
| GLB1L2    | PCNA    | BBOX1-AS1  | MYLK3     | NRP2    | MT1A      | EPB41L1 | SAMSN1    | CNTNAP2       | PLP2     | TLCD4    |
| SCAMP5    | MX1     | LIPT2-AS1  | PLCB4     | CCDC28B | PGLYRP4   | H2AJ    | ANO9      | DPY19L2       | KRT6C    | IL1R1    |
| LINC01432 | CASP4   | SH3RF3-AS1 | FAM171B   | PTX3    | PRIMA1    | TMA7    | PDZD8     | GRAMD1B       | HDAC11   | EMP2     |
| LINC02506 | IFI44   | DUBR       | IL34      | MT2A    | JDP2      | EDA     | PRRT4     | DAPK1         | RGS12    | KLK1     |
| KCNK1     | AIP     | PRAMEF4    | UNC13B    | ELL2    | GRK3      | NPRL2   | BCL7A     | SLC35F1       | NACC2    | RIMBP2   |
| PARM1     | ESRRA   | ERICH5     | LINC00997 | MAP3K8  | OSBP2     | NME3    | HIPK2     | PIP5K1B       | RHOB     | MPZL2    |
| FCMR      | PARK7   | TUFT1      | WNT7A     | PEL1    | TSPAN1    | LSM10   | ALDOB     | IFNLR1        | H2AW     | EFR3B    |
| SLC4A10   | FH      | ABTB1      | NCKAP1    | CD44    | KIF19     | CCDC86  | ABCC4     | MYO1E         | MRGPRE   | ACTL8    |
| SERPINE2  | DELE1   | LAMB1      | SOX13     | RAB30   | FGF17     | TMEM258 | ELF3      | LONRF3        | GAS6-DT  | PRRX1    |
| PGM5      | ADA2    | ALOX5      | DNM1      | MS4A7   | ANKRD29   | GCHFR   | CMAHP     | KIF13A        | KIAA1522 | GNG12    |
| CD163L1   | PPP1R8  | FAM41C     | NTRK3     | CXCR5   | ZNF827    | NCK2    | BASP1     | TP53BP2       | TSPAN12  | OTX2     |
| MEF2C-AS1 | SELPLG  | F2RL1      | NAP1L2    | PMAIP1  | IGFBP2    | APCDD1  | TNS3      | TGFBI         | TTC39B   | WFDC1    |
| GCSAML    | IFIT1   | SLC6A3     | CCDC88A   | CD36    | RORA      | ARMCX6  | STAT5B    | MAP4K4        | LGI2     | MCTP2    |

| Blue      | Green     | Skyblue    | Brown         | Red       | Black      | Yellow   | Orange   | Indigo  | Grey     | Purple    |
|-----------|-----------|------------|---------------|-----------|------------|----------|----------|---------|----------|-----------|
| EFNB2     | P2RY8     | SDC2       | OCLN          | SGPP2     | ZNRF1      | CFC1     | PALS2    | CDK20   | TMEM45B  | WIPF3     |
| BLNK      | PSMG4     | CHST14     | NLRP13        | VAV1      | GRTP1      | DMAC1    | PHKA1    | MTAP    | PLXND1   | ISLR      |
| FERMT3    | ACTR5     | KCNMB2-AS1 | MLC1          | LINC02605 | FAM43B     | RPS14    | TTC39C   | ADGRE1  | CREB3L4  | DYSF      |
| GNAI1     | RBIS      | DIPK1B     | ZNRF2P1       | DCP1A     | CD300C     | COMMD3   | BNC2     | PRPF38A | NEURL3   | ANKRD18B  |
| CD37      | CBWD5     | CALCRL     | KCNT2         | BCL2      | PHLDA1     | DPM3     | CMTM8    | LYSMD2  | TSC22D3  | DMRT1     |
| SELENOP   | MIEF1     | GREB1      | DGKB          | C21orf91  | SIM2       | TEX264   | THUMPD3  | LHX3    | PPP1R26  | ZBTB7C    |
| P2RX6P    | EARS2     | FGFR3      | MAB21L4       | PPRC1     | LEF1       | ANGPTL2  | FMR1     | CCDC71L | YPEL3    | PCDH18    |
| PAGE1     | RCC1      | IGLN5      | TRIM9         | ABI1      | TNFRSF25   | HRH1     | ATN1     | RCN1    | LIMK1    | CALML3    |
| GMFG      | SCMH1     | KAT6B      | TOGARAM2      | DRAM1     | INHBE      | C9orf64  | ST20-AS1 | RUNX2   | HBP1     | MAGEH1    |
| CARD18    | MRM3      | HOXB7      | DOP1B         | DMRTA1    | EGFL6      | SYVN1    | RNF135   | PEX5L   | PTMS     | OLFM1     |
| ILDR2     | SNHG4     | ACSM3      | DPY19L1P1     | GRIA4     | SEZ6L2     | VIPR2    | GPAT3    | HEG1    | VPS37B   | MIR205HG  |
| ABCG2     | RAN       | PINK1      | CHRD          | NOD2      | SMIM35     | NUDT2    | SETD5    | SPART   | TUBG2    | PITX1     |
| CHN2      | MIIP      | MAPK11     | MYO7B         | IL32      | SGK1       | SQLE     | CRACD    | HDAC9   | AGFG2    | AKR1C1    |
| BARX1     | SSBP1     | CRISP2     | ESPN          | RFTN1     | DUSP9      | UQCC3    | SPSB1    | SH3GL2  | ADGRG5   | CEP70     |
| KLHL9     | OAS1      | PPP1R3B    | ACOXL         | PIM1      | MELTF      | AURKAIP1 | CLIP2    | DOCK8   | FAM117A  | DPYSL3    |
| LY86      | NETO1     | MTM1       | PXDN          | PIK3AP1   | FAIM       | SEC24D   | WNT10A   | ETF1    | NUAK2    | BSND      |
| MACROD2   | CCDC57    | KCTD11     | TUBA1A        | ZDHHC18   | KLHL5      | TRMT112  | ZNF623   | DMD     | FGFR2    | TMEM179   |
| GPX7      | SYF2      | TADA3      | HRK           | CDKN2B    | ARHGEF4    | RBM38    | WDR81    | PDGFC   | SHANK3   | LINC01098 |
| SAR1B     | TTC13     | BAIAP2-DT  | PTPRE         | HGF       | SKAP1      | RNASE6   | CHIC1    | TEX9    | ST6GAL2  | PPM1H     |
| ZMAT2     | XAF1      | CCNI2      | EBF4          | IL12B     | NFATC2     | PLAAT3   | FAS      | EPHB2   | CACFD1   | PTPRJ     |
| ANKS6     | SAMHD1    | TMEM270    | MID2          | IL7       | MAPT       | RPS21    | RAB5A    | G3BP1   | NAB2     | KRT81     |
| ETS1      | MACROH2A1 | HOXB6      | CCDC144NL-AS1 | CXCL9     | LY6D       | LAMTOR4  | ARHGAP8  | VAV3    | MARCHF8  | CELSR1    |
| SERPINB6  | ACSL4     | OR7E14P    | DBH           | MIR155HG  | ALS2CL     | MTHFR    | SOCS6    | PPP2CA  | BRD3OS   | CSAG1     |
| MSRA      | GPD2      | GPRC5B     | PLEKHA7       | CXCL3     | ARHGEF10L  | NDUFA2   | MECP2    | GEMIN5  | ETV1     | PPL       |
| QPCT      | ENO1      | RHOD       | CLIP4         | TAF4B     | OBSCN      | FMN1     | PURB     | CBWD1   | FUT1     | ZPLD1     |
| PTP4A2    | ATP5F1E   | PTPN9      | TSC22D1       | ACSL1     | TMEM72-AS1 | PGRMC1   | BCL3     | AMD1    | ARID4A   | TLE2      |
| BRINP2    | ITCH      | SEN7       | LPGAT1        | IRF1      | CHAC1      | CD300A   | ST8SIA1  | CD28    | TMPRSS2  | KALRN     |
| LINC01192 | DUSP23    | RALGPS1    | ERRF1         | SOCS3     | NAT8L      | TMEM50A  | KIAA1671 | CCDC88B | SHMT1    | MTA3      |
| PRKCB     | XNDC1N    | PSMG3-AS1  | CNGB1         | RELB      | NSMF       | SHISA2   | SLC8B1   | SH3RF2  | BHLHE40  | KSR1      |
| IMPDH2    | CIAPIN1   | UICLM      | PADI4         | TNFAIP2   | LINC02474  | WDR82    | LONRF1   | FAM53C  | ANO8     | SATB2     |
| CTNNA1    | SLC5A6    | C3orf18    | DEGS2         | IFNGR2    | CCDC80     | TMEM42   | CBX6     | UVRAG   | MYCN     | FYN       |
| RBM47     | RAB8A     | KRCC1      | CEMIP2        | BCL6      | FHL3       | AIG1     | TPO      | GNB4    | NDRG1    | OLFM4     |
| C3orf14   | NCLN      | SMPD5      | LOXL1-AS1     | NFKB2     | ACOT2      | EIF4E2   | CXCL1    | LPXN    | ZYX      | SLC6A8    |
| CLTA      | CD2BP2    | GRHL1      | PDGFA         | CIITA     | IQCH       | UQCRQ    | CNOT10   | RYR3-DT | CHST12   | RIPK4     |
| TOMM5     | THOC3     | F2R        | RASSF6        | RALGAPA2  | TESC       | STX5     | PLAU     | IFRD2   | CBFA2T3  | STK32A    |
| USP4      | BCL7B     | OR2C1      | STRA6         | PHAX      | KCP        | ARHGEF3  | KIAA0232 | COPS7B  | CITED2   | CPXM1     |
| DCLK1     | TMEM243   | ANGPTL4    | CD3G          | STX4      | CXCL6      | MPV17L2  | TAF1     | AGTR1   | FRAT1    | SFRP5     |
| FADS2     | MAT2B     | B3GALT9    | MYO6          | CXCL11    | ACSM5      | ENTPD6   | BMF      | CCND1   | SLC25A45 | SORL1     |



| Blue      | Green    | Skyblue   | Brown     | Red      | Black      | Yellow     | Orange   | Indigo    | Grey        | Purple   |
|-----------|----------|-----------|-----------|----------|------------|------------|----------|-----------|-------------|----------|
| PLEK2     | MRPL58   | CLIP1     | ADAMTS17  | NAMPT    | LHX8       | TMCO4      | WDR31    | ROR1      | CLUAP1      | OLFML2B  |
| CNTN5     | GPSM3    | LIMA1     | KCNH5     | NCF2     | TLCD5      | SCP2       | DUSP10   | MS4A1     | MAP3K9      | KRT7     |
| ABRACL    | PRELID1  | GTSE1-DT  | PGBD5     | IER5     | CCNO       | PRKCE      | SMC3     | PRKD1     | PLAG1       | MAGEC2   |
| LHFPL1    | TNFRSF1B | PCGF2     | PKN3      | B4GALT1  | RNF43      | LYL1       | CD276    | LRRTM3    | ZMYM2       | ATRNL1   |
| TBL1Y     | OXA1L    | KBTBD2    | GNGT1     | NDE1     | IL13RA1    | ISYNA1     | GCNT2    | HNRNPAB   | CSRP1       | NECTIN2  |
| IL3RA     | PHC2     | CCZ1      | FAR2P2    | STARD4   | PDGFB      | TMEM179B   | ITGA6    | LINC02484 | SH3PXD2B    | ZNF467   |
| RNF182    | USP18    | ADAMTS1   | RPS6KA2   | RPF2     | CSR1-AS1   | KRT40      | RARRES2  | RBMS1     | HCG11       | SFTPA1   |
| ANTXR2    | UBXN1    | ZFYVE28   | RALGPS2   | NFKB1    | KLK15      | RTN3       | S100A1   | ANK3      | PIP5K1C     | KRT5     |
| MAGI2     | HERC5    | GOLGA2    | DNMT3B    | MACIR    | AMH        | ATP6V0B    | METTL6   | SPP1      | KCNJ4       | NLGN2    |
| CYSLTR1   | SOAT1    | CLDN7     | SRPX      | DOCK10   | PRR5       | SNU13      | PPP1R12A | ZNF518B   | RHPN1-AS1   | ZFYVE1   |
| TRIM58    | KDM4C    | DENND6A   | TDRD10    | C2CD4A   | DNMBP      | MRPS18C    | FDXR     | GPR137B   | ATP2A3      | SOBP     |
| LINC02273 | SDHB     | H1-10-AS1 | RASGEF1A  | SEC24A   | PTGES      | HINT2      | ANGEL1   | NRIP1     | FLYWCH2     | C1orf198 |
| JAKMIP2   | PIGU     | ABHD2     | KRT17P5   | EBI3     | LINC02054  | PEF1       | REEP3    | PLEKHG1   | SLC6A9      | SLCO3A1  |
| TMEM273   | PARP12   | ADCY5     | NUP62CL   | PLXNC1   | MRPS25     | PAAF1      | SUGP2    | WDR36     | TOR2A       | ARHGAP23 |
| ITGA4     | PLGRKT   | PRDM10    | ZIC2      | IER3     | LINC02593  | SH3BGRL3   | ATRX     | AK2       | SLC16A14    | ALDH5A1  |
| ARMCX3    | NDUFAF2  | PACSIN1   | KCNJ12    | ICAM1    | SEMA6B     | LTB4R      | SLC49A4  | SF3A3     | CMTM7       | CCDC190  |
| LPCAT2    | ANKRD39  | ABHD8     | ABCA3     | SIAH2    | MST1R      | SP2-DT     | TIAL1    | ZSCAN20   | TBC1D10A    | SLC6A19  |
| MYO10     | PLAAT4   | MAN2A2    | CHST15    | BATF     | VGFB       | OCRL       | NBPF15   | APTX      | BAIAP2      | HTR2C    |
| GTPBP6    | SH2B1    | LINC01503 | CYP2U1    | BTBD19   | GPR157     | NANS       | SPECC1L  | GCNT1     | RCOR2       | RHOC     |
| CYFIP2    | NADK     | DOCK11    | IQCE      | ARAP2    | EMID1      | GRHPR      | NF1      | HERPUD1   | FUT8        | GRB7     |
| PCSK6     | PTPN1    | ZRANB1    | INHBB     | CCL3     | GATM       | NREP       | LRRC1    | LCP1      | NATD1       | IL21R    |
| RRAGD     | ERVK3-1  | VPS33A    | FAM102A   | RNF180   | ADAM8      | ALKBH2     | ARL8B    | POLR1E    | ZBTB42      | FAM178B  |
| CPED1     | ACAD9    | WSB2      | USP9Y     | TASL     | FOSL2      | MRPS33     | ZC3H4    | CD74      | SMTN        | SLC6A15  |
| LINC01480 | NDUFAF3  | LINC00938 | CTPS2     | DDI2     | FAM120C    | VNN1       | TTC21B   | NPM1      | IL6R        | CRAT     |
| SSTR3     | FARSA    | PRTN3     | SAMD11    | HNRNPH1  | ABI3       | SPIN2B     | MTMR10   | DPH2      | INVS        | OTOGL    |
| FADS1     | PIIH     | STN1      | LINC00574 | RAPGEF1  | CCR2       | TSPAN17    | C21orf58 | NR3C1     | ABHD15      | PDZK1IP1 |
| ST3GAL6   | AK6      | BIVM      | THPO      | MAML2    | OTUD7B     | CDK2AP2    | CBR3     | LINC00623 | CAPN10-DT   | CERS3    |
| RERGL     | UCHL5    | ENGASE    | H2BC21    | RASGEF1B | C2orf74-DT | SLC27A5    | C2CD2    | ACSL5     | SH3RF3      | CORO2B   |
| HIGD2A    | EPS15    | NAA60     | TJP1      | HK2      | HHATL      | GNPDA1     | TIGD7    | ZNF98     | LZTS2       | KIAA0319 |
| PRRC1     | UBE2C    | LAMC1     | CERS4     | TNFAIP6  | CMTM6      | ARF4       | RTN4RL1  | RNF138    | HERPUD2-AS1 | A4GALT   |
| TMX2      | GRNDE    | MYO9A     | MORC4     | IKBKE    | CDH1       | TUBB2B     | KDM5C    | RBM15B    | SLC43A2     | PAPLN    |
| CCDC51    | RILPL2   | TTYH3     | PTPN3     | IL4I1    | DZIP3      | CDKN2AIPNL | NECTIN1  | ZNF676    | PEX1        | CGNL1    |
| PSME2     | METTL5   | SYNE1     | TBC1D16   | PRRG4    | EVL        | RWDD1      | CLU      | YRDC      | SPSB2       | RAB39B   |
| SERPINI1  | DERL3    | DYNLT2B   | PPP1R13B  | DEFB4A   | ISM2       | MGMT       | C1QTNF1  | RND3      | LRP11       | ARL4C    |
| TNFSF11   | CCDC12   | IL18      | PLA2G4D   | NFKBIA   | TMEM158    | NXPH1      | KIF26B   | KMO       | MOAP1       | ZCCHC24  |
| MS4A4A    | DCX      | TANC2     | TUBB6     | ALCAM    | ATP1B1     | CCDC127    | TNRC6C   | USP46     | PLCG2       | CERCAM   |
| PRPF6     | TRIM22   | NBL1      | KCNK9     | LYN      | MECOM      | FKBP7      | BRWD1    | NXF3      | COL9A3      | LAX1     |
| SMCO4     | SNHG3    | DTNB      | SEMA3A    | CCL4     | ZBTB46     | TMSB4X     | JOSD1    | PRNP      | FAM210B     | DLG5     |

| Blue     | Green      | Skyblue     | Brown      | Red      | Black     | Yellow    | Orange    | Indigo    | Grey       | Purple    |
|----------|------------|-------------|------------|----------|-----------|-----------|-----------|-----------|------------|-----------|
| SPCS1    | NECAP2     | NECTIN3-AS1 | TUBB3      | JUNB     | ITGB2     | BTBD3     | ITPR3     | TAGAP     | RAB20      | PDXK      |
| BTN3A3   | ISG15      | TFAP2A-AS1  | NPAS2      | NETO2    | BCAS1     | MRPL2     | ANKRD26   | CD47      | RASAL1     | PRAMEF11  |
| MCTS2    | TFCP2      | RAB43       | EPB41L5    | BID      | SDHAF4    | RPS27L    | TOPBP1    | MLKL      | KLHL24     | RIN2      |
| DBN1     | CYB561     | ZNF594      | ZMAT4      | PLK3     | LYSMD4    | OSBPL11   | ETS2      | OGFRL1    | ATP13A3-DT | KRT86     |
| BRMS1    | AKAP8      | B3GNT4      | NLRX1      | OPTN     | LINC02707 | SVOP      | JPX       | DAPP1     | IL10RB     | ULK1      |
| SLC25A6  | HINT1      | PNMA1       | RASD2      | MMP13    | IL4R      | CYSTM1    | RAB27A    | SZRD1     | SPATA20    | RAF1      |
| LY75     | TRANK1     | BAZ2B       | IQGAP2     | NUP153   | LINC00880 | MGAT1     | TCTN1     | UBAP2     | TRIM61     | CCDC102A  |
| BEST3    | PELP1      | LTBP1       | YWHAZ      | PPTC7    | FOXD2     | POLR2G    | NKAP      | SLC43A3   | IFT27      | ACVR1C    |
| USP19    | FCRLA      | C13orf46    | NCOA1      | TET3     | GPSM1     | RPS3      | KCNH4     | EPB41     | CIBAR1-DT  | FHL1      |
| SIGMAR1  | SCAP       | ZNF772      | CDON       | LYAR     | LINC01967 | SMIM26    | CHM       | ADSS2     | PLEKHO2    | LINC01016 |
| MYO1F    | MRPL33     | FBXO32      | FKBP9      | CDC42SE2 | KIAA0895  | DOK6      | MKRN2     | HARS2     | CCDC126    | HES1      |
| TRAPPC3  | SLC35A4    | RASGRF1     | FXYD2      | SRFBP1   | TRIM16L   | SDHAF3    | TMEM63B   | SPATS2L   | MARVELD1   | PNPLA5    |
| UBE2D2   | DHDDS      | PAN2        | MRC1       | ZC3H12A  | PPP1R3F   | CSRNP1    | BBS2      | ATAD3A    | TMEM164    | CDH3      |
| RER1     | EFHD2      | TNKS2       | ESRP1      | NUS1     | GNB3      | PARS2     | PRKD3     | LINC00944 | PTGDR2     | CTHRC1    |
| RPL14    | GLRX3      | SLC7A11     | RHOXF1P1   | MDFIC    | HMGN3     | TMEM109   | CEBPB-AS1 | CLINT1    | INAVA      | ARHGEF11  |
| SP140    | GLRX5      | NR2C2       | DSP        | USP1     | TTC8      | RAB3A     | KCNA2     | TOE1      | HDGFL2     | PRAMEF9   |
| ZNF804A  | BMI1       | UAP1L1      | PTPN12     | BIRC3    | ZNF558    | CX3CR1    | STS       | MYEF2     | TMEM117    | ARHGAP15  |
| WAS      | TIMM13     | SEMA3G      | FGD5-AS1   | TOPORS   | LINC01674 | SOCS2-AS1 | NRARP     | GPR158    | DENND10    | MAGEF1    |
| FAR2     | HSPA1A     | LINC02561   | TIMP2      | NFKBIZ   | IGFBP6    | ELOF1     | RGS16     | EMC1      | TBC1D9     | DBH-AS1   |
| GPAT2    | ERH        | SLITRK5     | FAM133A    | SOX2     | CACNG6    | FDFT1     | SEL1L3    | NOP16     | AJM1       | FER       |
| EXOSC3   | RPL35A     | GPR107      | NOTUM      | RAPGEF5  | FSCN1     | MFSD12    | GCNT4     | RYR2      | SLC7A7     | ECI2      |
| SLC16A7  | POFUT1     | MC1R        | MARVELD2   | OXSR1    | PLEKHG3   | TMEM59    | WDR90     | PLAA      | TOM1       | CNN3      |
| PLEKHG4B | PSMC5      | CLDN9       | CHEK2P2    | ZBED1    | TMEM184A  | ADRM1     | PHYH      | LGALS8    | SNX30      | PLD4      |
| LY9      | PDCD2L     | TBC1D19     | PPP1R14D   | STARD5   | SDC3      | SRP68     | PHF2      | FAM111B   | TOR4A      | EFNB1     |
| SORT1    | EMG1       | ERBIN       | UNC119B    | PUM1     | LRRC75B   | NXT1      | RAB11FIP3 | SLC36A1   | FAM107B    | LARGE2    |
| STARD3NL | HID1       | CCDC186     | PLCD3      | PIK3CD   | GNGT2     | ADRB2     | BRPF1     | PRELID3B  | HBA1       | FAM169A   |
| SYNDIG1  | DMAC2      | ANKRD28     | H2AC11     | INSIG1   | NCS1      | FUZ       | DYRK1A    | TTI1      | S100A11    | BHLHE41   |
| MTHFD2L  | DNAJC12    | MIAT        | CRYBG3     | RUNX3    | TRAF1     | ZNF672    | MCM3AP    | CDC25A    | TMEM9      | PTGS1     |
| CAP1     | DLGAP1-AS1 | KDM6A       | FANCD2     | ZRANB2   | B4GALNT4  | SHISAL2A  | HIVEP3    | RBM22     | PRIMPOL    | LINC01315 |
| CKAP4    | SLC35B1    | KBTBD7      | MLF1       | SLC25A24 | CDK18     | CAPG      | RASSF5    | CCNJ      | ST3GAL4    | ZNF319    |
| BCAT1    | UBE2B      | VAMP4       | LINC02910  | ROR2     | MAGEA3    | SDF2L1    | WDR44     | TNFRSF14  | ADM        | SLC15A1   |
| SLC17A9  | TRMT2A     | SWI5        | OPRD1      | TFAM     | SECTM1    | BLK       | CUL9      | ATAD3B    | ZNF385A    | ASPHD1    |
| UGT8     | CAPZA1     | DPY19L2P3   | TIMD4      | CEP85    | KCNK12    | DRG1      | ZBTB10    | ZNF22     | PRPSAP2    | ENTPD2    |
| TRIP6    | NIPA2      | SYNE2       | UTS2R      | EPOP     | TPPP3     | OSTC      | CAV2      | CA8       | PIK3CG     | SULT4A1   |
| MRPL22   | GNAS-AS1   | SLC2A12     | APP        | CSF1     | TREX2     | CRIP1     | PPFIBP1   | DHX37     | ZSCAN30    | JDP2-AS1  |
| COX20    | POP5       | DPY19L1     | MAST4      | CASP3    | SH2D5     | VEGFB     | GSE1      | COA7      | PLEKHH3    | ELFN1     |
| PRELID2  | POLR3K     | TCP11L2     | NLGN1      | GADD45B  | CFAP157   | SLC52A2   | FAM230C   | HSPA9     | ATP2A1     | TXNRD3    |
| MYL1     | LARS2      | MTMR2       | ADARB2-AS1 | CRACR2A  | ZDHHC11   | NAT14     | TP53INP1  | TM9SF4    | ACP6       | RAB31     |

| Blue    | Green     | Skyblue   | Brown     | Red      | Black       | Yellow     | Orange      | Indigo    | Grey      | Purple    |
|---------|-----------|-----------|-----------|----------|-------------|------------|-------------|-----------|-----------|-----------|
| RUFY1   | PHAF1     | ZNF606    | FBXO43    | SLFN5    | GRAMD4      | TRIAP1     | TSPOAP1     | PSMB2     | PAQR4     | BCAM      |
| HMGXB3  | FOXP4-AS1 | ATG7      | MGAT3     | TPTEP2   | APLF        | TNFRSF17   | SDCBP       | FCHSD2    | ZBTB7B    | NANOS1    |
| ZNF257  | MYL12A    | ARID3B    | GDNF      | SERBP1   | HECTD2      | CYB561D2   | RFC3        | ZNF639    | SIRT3     | AIF1L     |
| MFN2    | TXNDC15   | CITED1    | SPINT1    | DCK      | CD48        | MAPKAPK3   | SBF1        | NFX1      | ABCD1     | SLC4A4    |
| SLC15A3 | DTNBP1    | OSBPL5    | SLC12A6   | ATP13A2  | FABP6       | TMBIM6     | GART        | PDCD11    | TBKBP1    | ASB9      |
| PTER    | PDCD6     | PATJ      | LINC00957 | RPIA     | ZSWIM4      | SPATC1L    | CACUL1      | NOC2L     | SLC16A3   | NPTX1     |
| IMMP2L  | TNFRSF13B | LRRC37B   | EIF2AK1   | LTB      | THEM5       | USP7-AS1   | CYP1A1      | RCL1      | SIGLEC9   | CCR10     |
| FAF2    | BMP6      | TOR1AIP1  | IRX4      | GRPEL1   | FUT2        | VPS51      | ANKRD11     | DNAJC6    | ZNF821    | LINC00242 |
| APBB1IP | ISOC1     | MMP25-AS1 | CEP170B   | YWHAG    | ANKRD36B P2 | ACTR8      | MTUS2       | HNRNPA0   | CERK      | DHX32     |
| CSTPP1  | CAP2      | RLIM      | SYTL3     | CCR1     | C15orf48    | ZNF675     | VDR         | NSUN4     | BBS9      | GNG10     |
| TSPAN7  | EBLN3P    | SPTB      | TRMT2B    | ZNF253   | NUPR2       | RPS26      | MACF1       | SLC25A33  | TSR2      | BCAR1     |
| EIF2B3  | KLHL6     | CKAP2L    | MAGEA6    | ANKRD33B | CRIP2       | TNFAIP8    | TGFBR3      | MAX       | LINC02341 | ACTN1     |
| MRPL36  | RPSA      | S100A9    | AOC3      | PPM1K    | ADAM19      | KRTCAP2    | PCYT1A      | FOXJ3     | KIFBP     | SH3TC1    |
| RBBP4   | SMPDL3B   | PAPSS1    | KLHL42    | CXCL8    | RUNX1       | TMEM223    | PROSER3     | GOLT1B    | CBX8      | FAM3B     |
| SSR1    | SNHG21    | MAMDC4    | FRMPD3    | ANKRD30A | GPR153      | ATP5MC2    | PBX2        | TSPAN5    | GDPD5     | PECR      |
| OSBP    | MAPKAPK2  | S100A13   | COBL      | PSD3     | NEIL2       | EXOSC1     | SPAG1       | SIDT1     | CCDC122   | CLDN4     |
| IK      | CCT5      | NEO1      | UBE2QL1   | NIBAN1   | LINC02870   | KLHL21     | AHRR        | PHF20     | PIK3R3    | ACADVL    |
| LILRB4  | TIMM22    | RRAGB     | ZFPM1     | SH2D3A   | CDC42EP4    | TRIM52-AS1 | OLIG2       | EBNA1BP2  | SRGAP2D   | H2BC11    |
| VDAC1   | DDOST     | UBP1      | AAK1      | SELENOT  | RGL3        | PLPP2      | KIAA0753    | EXOSC10   | ABHD4     | ARRDC1    |
| HEMK1   | RAD51B    | USP28     | MAGEB2    | OXTR     | PNPLA2      | INTS5      | ADM2        | FBXO38    | EGLN3     | SUMF1     |
| CANX    | CYP27B1   | SLC2A3    | HERPUD2   | MMD      | TSPAN9      | SEC22C     | HSD17B1-AS1 | CHSY3     | FUCA1     | GADD45A   |
| SEC61B  | CRLS1     | APOL4     | ADAM22    | UTP23    | LINC02253   | DTWD1      | CARD9       | SFPQ      | ZMYM3     | COL18A1   |
| YIPF5   | COMMD10   | SYP       | ODAD3     | B3GNT2   | GRIN2C      | SSU72      | SUN1        | DCAF1     | TP53INP2  | CRACR2B   |
| TKT     | APMAP     | KRT17     | MYO7A     | CHSY1    | LINC01805   | ABHD14B    | PINCR       | DHX30     | TMEM65    | ZNF542P   |
| SPCS2   | RDH11     | FCGR2A    | SLC25A43  | RAPH1    | KCNJ11      | RPP25L     | PCNX4       | C1orf109  | HCFC1-AS1 | CYTH3     |
| TMEM201 | SART1     | FBXL18    | MAN1C1    | NFE2L3   | FAM83H      | SMIM30     | BCOR        | LINC01145 | ZNRF2P2   | ILF3-DT   |
| CREB3   | LSM11     | TBC1D12   | AKR1C3    | SETBP1   | TEAD3       | RPL36      | SIK3        | CTSS      | CLMN      | FAM124A   |
| TTC1    | APOBEC3G  | MIB1      | ITSN1     | IGFBP3   | SHF         | PREB       | MIR503HG    | RELA      | MAPK3     | PLXNB2    |
| NKX2-1  | FBXO6     | RTL10     | LINC02257 | WIPF1    | FNBP1       | EEF1D      | CDKN1A      | FAM193B   | MKS1      | ADAM11    |
| TRIM44  | ALYREF    | HDAC4     | PALLD     | HNRNPU   | SLC16A13    | DHCR24     | ASB1        | WDR77     | EPS8L1    | MANSC1    |
| UBA7    | RNF121    | ATXN3     | SH3BP4    | PPIF     | HTATIP2     | PLA2G15    | TNFRSF10D   | LINC00869 | RETREG2   | SAYSD1    |
| YOD1    | KHDRBS1   | CARD10    | NUP210    | SBDS     | CDC42BPG    | LIN52      | RABGAP1     | TTC4      | ODAD4     | SORBS3    |
| PSMB9   | MMP24OS   | MIR4664   | PDE5A     | ELOA     | WDR59       | FRMD3      | ATAD2B      | GIMAP6    | BTBD2     | GSTZ1     |
| CD33    | RBFA      | ANKDD1A   | GK5       | RNF11    | LLGL2       | ALG5       | SH2B3       | AKIRIN1   | NIPSNAP1  | SLC44A3   |
| TIMM10  | BTN3A1    | SLC51A    | CDK16     | NEDD4L   | ITGB4       | ALG12      | GATD1       | SEMA3C    | BNIP3L    | RPS10P7   |
| SEC22B  | DPP3-DT   | FBXL3     | CCDC74B   | FMNL3    | TEP1        | FDX2       | CNTNAP1     | KAZN      | CCNG2     | CSTB      |
| STPG1   | ELOC      | TMEM210   | EML5      | IFIT3    | NPHP3       | MYLIP      | RBKS        | PARP8     | RTN4RL2   | SCHIP1    |
| CTU2    | ATP5MK    | MOB1B     | HERC2P4   | APOL3    | MKRN9P      | SLC50A1    | EML2        | NOL7      | CTDSP1    | PPP4R1    |

| Blue      | Green     | Skyblue      | Brown     | Red      | Black     | Yellow      | Orange    | Indigo   | Grey      | Purple    |
|-----------|-----------|--------------|-----------|----------|-----------|-------------|-----------|----------|-----------|-----------|
| IL12RB1   | GNB1      | CACNB1       | ADCY9     | CSNK2A1  | POMC      | NDUFS4      | PHF21A    | GGA2     | SNX29     | SLC27A2   |
| NADSYN1   | PSMB8     | TRAPPC6B     | SKAP2     | ZNF267   | IQCG      | CUTA        | GRB14     | IFNG-AS1 | KRT16     | YPEL5     |
| LRRC47    | TRMT6     | PPP1R12A-AS1 | FURIN     | IL2RA    | MAPK12    | PCYT2       | TSPAN33   | TMEM138  | RAD17     | LINC01139 |
| APBA1     | RUVBL1    | LNP1         | CEP128    | ZFP91    | LRG1      | FMC1        | IRF8      | ERLIN1   | ZNF836    | CSRP2     |
| LARS1     | RASSF3    | PRDM5        | DCLK2     | TNFRSF9  | CFAP36    | SLC25A20    | TFE3      | SCML1    | GATD1-DT  | ADAMTSL2  |
| RUBCNL    | MRPL47    | ZNF429       | MICALL2   | FAM3C    | EMC3-AS1  | ATP6V0E1    | SEPTIN7   | DNAJA1   | SH2D3C    | ADGRB2    |
| PTMA      | ELOVL1    | CAMK2N2      | MTURN     | GTPBP1   | COX6C     | RPL23A      | MAP7D3    | CTPS1    | PC        | EPN2      |
| IL24      | HLA-B     | ADAM10       | BCL9      | PGLYRP2  | CARMIL1   | RPS13       | NCOA7     | DPP4     | ATP23     | PCNX2     |
| ARHGAP17  | CSNK1G3   | P2RY1        | SCCPDH    | NUAK1    | LCAT      | SLC25A38    | APOBEC3B  | WDR55    | MCOLN1    | REERG     |
| CPNE3     | POLR3F    | RHPN1        | SPIRE1    | LARP1    | SLC12A4   | RPS25       | SLC9A1    | CLCN6    | DSTNP2    | LAMA5     |
| CAMK1D    | CLNS1A    | TAB2         | DBNDD1    | QKI      | MIR548XHG | DPYSL4      | PITPNM1   | PPP4R1L  | FAM214B   | KRT13     |
| ZC4H2     | MRPL48    | TUG1         | TBC1D8    | TRIP10   | SH3BGR    | SRC         | CDK13     | ADPRS    | LINC01003 | ACP3      |
| UBAP1     | COX5A     | PTPN21       | NOXA1     | RAB11A   | MARVELD3  | ZFP69B      | ACTR3C    | GIMAP4   | LRRN4     | EHD3      |
| PLAC8     | NFIA      | ZHX3         | TTC3      | CXCL12   | LINC02188 | CPTP        | FBXW2     | THG1L    | HAGH      | AOPEP     |
| EXOSC7    | LZTFL1    | IRX4-AS1     | CRTAP     | SMARCA2  | CBR3-AS1  | MORF4L2-AS1 | OSBPL3    | TMEM69   | FAM167A   | PCTP      |
| EAF2      | EXOC3     | DDX53        | DOCK6     | CEBPD    | IVD       | FAM89B      | MED12     | OXR1     | CAPNS1    | STMN3     |
| DCAF12    | TIPIN     | MXRA7        | FZD7      | PIM2     | KIFC2     | TNFAIP8L2   | RASSF2    | HBBP1    | FAM78A    | CFD       |
| OLMALINC  | NDUFB6    | SUPT20H      | TFDP2     | HAPLN3   | AMDHD1    | RPN1        | RBSN      | UTP11    | KIAA0895L | TMEM231   |
| COA4      | CDKN2A    | YJEFN3       | DLG3      | WDR3     | SPESP1    | BET1        | LRRC37A4P | UIMC1    | CCM2      | AQP3      |
| SLC25A46  | MX2       | SPEN-AS1     | FHOD3     | TICAM1   | RP9P      | RPL19       | PCM1      | ZNF729   | XKR3      | BTK       |
| MRPL20    | PHLDA2    | ARMC8        | PLXNB1    | HIVEP2   | CREB3L1   | CYB5B       | CUX1      | EEF1E1   | RNPEPL1   | CACNA2D2  |
| ATP10D    | NIFK      | CBR1-AS1     | ACVR1     | ARHGEF40 | C16orf74  | ZCCHC17     | C8G       | PRKAR2A  | PLEC      | RNLS      |
| REEP5     | TXNDC11   | NCOA2        | MFHAS1    | CCL2     | DNAAF8    | SEC31A      | CNTRL     | TDRD7    | ENKD1     | PANX2     |
| TFB2M     | ANO7L1    | VTI1A        | LINC02064 | PITPNB   | HOXB4     | MPG         | B4GALT5   | GRWD1    | KDM7A-DT  | COL4A4    |
| ESYT2     | MRPL1     | SEPTIN3      | LINC02983 | GFOD1    | TCTN2     | PLPP5       | EPHA10    | RRN3P1   | CD72      | CFH       |
| NFYC      | YBX3      | ZBED3        | IER5L     | AIM2     | URGCP     | ZFP42       | KREMEN2   | MCUR1    | SCN9A     | TNRC18    |
| LINC01606 | LAMP3     | AEBP1        | FAM214A   | GSPT1    | GINM1     | TMC5        | NONO      | KCTD5    | THRA      | HEXB      |
| C1orf174  | WDR4      | RWDD2B       | EXT2      | MYBPH    | EEF1A2    | MPC1        | CENPE     | SP110    | TMEM254   | LINC01414 |
| DNAJC15   | MRPS15    | HSPA2        | ATE1      | SNX20    | EGFL7     | RPS5        | ADD2      | ARIH2    | TIGD3     | NUDCD3    |
| GNE       | MMADHC    | RAPGEF2      | DENND6B   | NDUFAF4  | INSIG1-DT | MINCR       | TRNT1     | GALT     | NT5DC1    | FGFR1     |
| IFI27     | ZFAS1     | IFT80        | C3orf33   | TGIF2    | SNX8      | CHAMP1      | TRIP11    | ATG12    | CCDC50    | H2BC4     |
| LARGE1    | PFKP      | NEDD4        | SSBP2     | IRF2     | DNASE1L3  | NOP10       | IFNAR1    | SMU1     | KANK2     | LXN       |
| CPSF7     | TFAP2C    | CENPF        | OAT       | PSME4    | TMEM260   | BEX1        | MKI67     | AKAP17A  | CLSTN3    | ZBTB4     |
| DPM1      | LINC02864 | C10orf88B    | TRNP1     | FAR1     | CIB2      | MRPS18B     | JMY       | GIMAP2   | ASTE1     | EDEM1     |
| COMT      | EIF2B4    | RNF215       | MANBA     | ZC3HAV1  | SLC27A1   | ZFP69       | ITSN2     | TWNK     | CALM1     | NFIX      |
| MRPL16    | ZNF232    | TCP11L1      | ZNF318    | WWC1     | CHST2     | ATG4C       | NKIRAS1   | DDX41    | LINC02982 | HACL1     |
| ZMPSTE24  | UBE2L6    | SETDB2       | ZNF322    | ID2      | HSPA6     | GORASP1     | TMTC1     | ZC3H15   | ERCC2     | SPIRE2    |
| MAGOH     | PPP1CA    | LINC00662    | PHACTR2   | IRF9     | FHIP2B    | BANF1       | NCOR2     | TMEM106A | ST14      | ABCB9     |

| Blue      | Green     | Skyblue   | Brown    | Red       | Black      | Yellow     | Orange       | Indigo   | Grey      | Purple  |
|-----------|-----------|-----------|----------|-----------|------------|------------|--------------|----------|-----------|---------|
| ACO1      | ZNF385B   | RNF103    | EVC      | C12orf29  | ZNF844     | MEA1       | MPHOSPH9     | CHCHD3   | MXN1-AS1  | SPIN3   |
| RFT1      | BRD8      | FOX2-AS1  | ZBED5    | MASTL     | PFN2       | DHRS1      | DUSP5        | PDE3B    | MCM5      | TALDO1  |
| RNF145    | ABHD5     | DYNC1H1   | GARS1    | ZFP36L1   | RTL8A      | ZNHIT1     | ADCY1        | CMPK1    | BAK1      | RBFOX1  |
| PAM       | ERAP1     | SMC2      | RAVER2   | CEBPZ     | RGS10      | CARD17     | TCAF2        | CCT2     | TKFC      | BICD1   |
| MRPL49    | MARCHF3   | LMTK3     | LINGO3   | PUM3      | PKD3       | MRPS34     | CELSR3       | KCNQ5    | USP51     | STRADB  |
| DRG2      | GNPDA2    | MRTFB     | LANCL1   | EYA1      | SLC9A9     | TTC22      | NIN          | HAUS6    | PIERCE2   | IGSF9   |
| QPRT      | JPT2      | PAK6      | ARHGEF12 | CLK4      | CHD3       | MEAF6      | SLC25A25-AS1 | KANK1    | INPP5K    | H2AX    |
| CDC23     | FAM32A    | LGALS1    | TFAP2A   | CDK6      | ACTR1B     | PRANCR     | CUL7         | TPD52    | SERTAD3   | PMS2    |
| MIX23     | MUTYH     | ZFYVE16   | PRRT3    | IKZF1     | IL2RG      | NUDT22     | AMMECR1      | BRD9     | BRF1      | CCDC69  |
| YTHDF2    | SNRK      | SNX12     | HIBADH   | AHCTF1    | TNFAIP8L1  | NAT1       | CEP350       | UTP6     | TYSND1    | SMKR1   |
| ZCCHC7    | MBIP      | STARD8    | C22orf46 | IL15RA    | PSPH       | UNC5A      | SEPTIN7P2    | ZDHHC5   | STBD1     | IQSEC1  |
| UAP1      | PPP1R14B  | CLASP2    | ABLIM1   | TOP3A     | CSNK1E     | SLC7A8     | TPST1        | DEGS1    | PSAT1     | PLEKHB1 |
| ZBTB80S   | POLR1C    | SPTBN1    | ENO2     | NOL11     | RYK        | GMPPA      | SLC25A53     | GAR1     | OSBPL6    | SLC35G1 |
| DUSP7     | NSA2      | GDPD3     | ACER3    | EIF4H     | MESP1      | RPL26      | PPP1R12C     | SNRPB2   | CASP6     | XXYL1   |
| MED24     | EEF2KMT   | ZNF714    | TSPYL4   | KDM2A     | LGALS2     | RPL28      | C1orf21      | SREK1IP1 | ZXDC      | CD4     |
| ARMC6     | C18orf21  | BRWD3     | WNK2     | TIPRL     | AKR7A3     | RBM33-DT   | MPRIP        | TIMM17A  | MKLN1-AS  | GLS2    |
| MRPL21    | PFDN6     | NHLRC4    | CAMKV    | KPNA6     | SLC26A11   | FBNP1L     | UTY          | MNS1     | PHYHIP    | SERAC1  |
| MANF      | SCNM1     | EPG5      | ID1      | GORAB     | SLC30A4    | VAMP1      | LARP4B       | LIMD2    | ZDHHC4    | RSRC1   |
| DMKN      | PCBP4     | APOOL     | NRDE2    | FRMD4B    | LINC00920  | TMEM70     | MREG         | CPNE8    | RXRB      | ALDH3A2 |
| SEC23B    | LSS       | IGF1R     | LDAF1    | RAB21     | C4orf36    | RNF207-AS1 | FLOT1        | MRPS30   | TOX2      | ADPRHL1 |
| PODXL2    | B3GAT3    | AVL9      | DIP2C    | GCH1      | U2SURP     | SPTSSA     | SH3BP5-AS1   | SFXN1    | MIEF2     | CLCN5   |
| ARHGAP30  | NUB1      | KIAA1109  | FMO4     | WBP11     | MIF4GD-DT  | RPL18A     | ANKRD10      | DENND1B  | PIGC      | OTUB2   |
| TOMM22    | MIR3667HG | CPD       | MAPRE3   | SYNCRIP   | FBXL19-AS1 | TMEM101    | CASP8        | NUFIP1   | FZD1      | PCCB    |
| JCHAIN    | HSPA4     | SIPA1L2   | AFAP1L2  | COMMD5    | CMTM4      | ABCB6      | GDI1         | MIR646HG | MEF2D     | LTBP4   |
| LINC01194 | SRSF4     | CD109-AS1 | CEP68    | ZNF598    | PTBP2      | CEP41      | ASAP1        | HMGCS1   | ORAI3     | MBTPS1  |
| ZNF296    | ARFGAP3   | H2AC17    | ITGA3    | BCL2A1    | ATP6V1E2   | RPS12      | SHOC2        | MTA2     | RTN4IP1   | BRD3    |
| PGD       | PLAAT2    | SLC38A6   | CAPN7    | LINC02397 | TFCP2L1    | PRMT5      | DTNA         | SDHD     | ZNF395    | DONSON  |
| SNRNP40   | BST2      |           | FBXO3    | PIGV      | ETFDH      | AKIP1      | EPIC1        | PNRC2    | ARL15     | XPC     |
| MORC1     | RHEB      |           | ZNF12    | YTHDF1    | H4C14      | RPL41      | RDX          | PWWP2A   | PIP5KL1   | DIRAS1  |
| DDAH1     | SHFL      |           | NUMBL    | MPI       | BBC3       | MRPL43     | KLHL11       | RAPGEF6  | FRAT2     | SHANK1  |
| SNX2      | PIIE      |           | PIK3CB   | DUSP2     | TXNRD2     | RPS16      | CREBBP       | FBXW11   | TRAM2-AS1 | LRP1    |
| TBC1D9B   | PPIP5K1   |           | AKR1C2   | SVIL-AS1  | NSMAF      | TRPM2      | STX6         | TIGAR    | MISP3     | CD151   |
| RPL26L1   | NASP      |           | EFNA5    | CD274     | TBXAS1     | RPS15A     | PDCL         | NME6     | MXD4      | ZNF516  |
| ERGIC1    | SORD      |           | INKA2    | SLU7      | LINC01655  | MIEN1      | VHL          | LUZP1    | H1-10     | TMC8    |
| LRRC59    | SUB1      |           | CRBN     | NCOA5     | LINC02444  | RBM4       | VPS41        | HNRNPR   | SDC1      | BTG2    |
| RPL11     | SLC15A4   |           | SELENON  | MB21D2    | PLEKHF1    | IDH3G      | ADGRL1-AS1   | CHMP5    | CD63-AS1  | CXCR3   |
| RPL22     | THNSL1    |           | KAT2B    | CTNND1    | BICDL1     | AP3S1      | SETD1B       | PPIP5K2  | PJA1      | ZNF219  |
| HIGD1A    | GNAS      |           | L1CAM    | NOL10     | PPP1R16A   | MRPL10     | LRRC8B       | ZCCHC10  | C14orf93  | FEZ2    |

| Blue      | Green      | Skyblue | Brown      | Red     | Black       | Yellow    | Orange     | Indigo    | Grey       | Purple   |
|-----------|------------|---------|------------|---------|-------------|-----------|------------|-----------|------------|----------|
| RARS1     | USE1       |         | MEGF6      | PANK3   | SMG6        | MRPL45    | ACADSB     | EMC6      | IFT22      | SOS2     |
| MIR3147HG | MRPL37     |         | PDCD6IP    | BRIX1   | ADSS1       | GNAI2     | TOGARAM1   | DCTPP1    | ADCK2      | MYO5B    |
| MED8      | TIMM9      |         | NRCAM      | RBM17   | KLF9        | OST4      | PDE4D      | BOD1      | ZNF561-AS1 | PREX1    |
| NOP9      | PHB2       |         | MGST3      | CRLF3   | RECQL4      | RAB1B     | RAB9A      | ME1       | CREBL2     | EVI5L    |
| RTF2      | STIP1      |         | NPTXR      | WDR75   | H2AC13      | LINC01123 | SBF2       | TMEM165   | PKP2       | RPH3AL   |
| F2RL3     | PPAT       |         | MAP7       | NAA50   | GLTP        | KDEL3     | RRAD       | VDAC2     | SNX24      | CA11     |
| PHF5A     | APEX1      |         | MTPN       | CYB5R2  | ARID3A      | CYBA      | MED13L     | DOHH      | MAP10      | MCMBP    |
| POMGNT2   | MIB2       |         | ABL1       | IFIT5   | LHPP        | MRPS31    | CHST7      | GBA2      | MYL12B     | FBF1     |
| DANCR     | RBL1       |         | HLCS       | CNOT9   | HAS3        | ANG       | POMK       | HLA-DMA   | MESP2      | RPUSD3   |
| FAU       | CORO1C     |         | EDIL3      | STK38L  | INF2        | MAMDC2    | POGZ       | MRPS35    | MFSD13A    | CEP164   |
| RCE1      | DEK        |         | GARS1-DT   | USP15   | MMP17       | SPON2     | KCNA3      | KCNAB2    | SERPINE1   | ZP3      |
| TMEM218   | SSR3       |         | BOLA1      | IGFBP4  | REEP6       | RPLP0     | PRRC2A     | QRSL1     | MMP15      | FUCA2    |
| ZNF90     | RELT       |         | MGAT5B     | PDE4B   | MOK         | SNAI3     | ORC2       | KTI12     | TPRN       | HMG20B   |
| TAF12     | ARL3       |         | NGB        | UTP20   | THBS3       |           | HOMER1     | ZNF716    | ITGB5      | NIBAN2   |
| RAB30-DT  | MED19      |         | MAGEA10    | BTG1    | NDNF        |           | MAP3K4-AS1 | CAPN2     | NPDC1      | ANKRA2   |
| PYGB      | PARP9      |         | MYO1C      | MCL1    | LINC01881   |           | SIN3B      | NLE1      | SCARB1     | LSP1     |
| CLP1      | RPS20      |         | DCLRE1A    | LYRM7   | CFAP73      |           | MYO1B      | MYD88     | TST        | WDSUB1   |
| ASMTL     | TNFRSF8    |         | TMEM250    | UTP25   | TMSB4Y      |           | ATF4       | RIOK2     | ZNF362     | BBS10    |
| MGLL      | COPZ1      |         | PLPPR2     | IFIT2   | SLC9A3R2    |           | CCDC174    | ZNF589    | ARPC4      | PIERCE1  |
| SEC61G    | SAMD10     |         | FOXO4      | BMS1    | ST6GALNAC6  |           | DBR1       | ERAP2     | BAZ2B-AS1  | ITM2C    |
| LMAN1     | IDH3B      |         | SPINT1-AS1 | NRROS   | CC2D1A      |           |            | GAL       | CBX4       | FAM53B   |
| SOCS2     | MRPS18A    |         | ATP2B4     | MYB     | TRIM68      |           |            | ATP10A    | TMEM242    | TIMP1    |
| GMPPB     | PINK1-AS   |         | CIC        | GBP1    | GUCY1B1     |           |            | COL27A1   | TOB1       | FZR1     |
| TIMM8B    | DNAJC1     |         | SLAIN1     | GTF2I   | IFT88       |           |            | LINC01229 | PMM1       | XYLT2    |
| FKBP11    | ANXA2R-OT1 |         | LBH        | ATAD1   | MLXIP       |           |            | CALHM6    | SOX8       | H2AZ2    |
| POLR2K    | GPR89A     |         | DCAF6      | HELB    | NPW         |           |            | PML       | IFT43      | SNTA1    |
| ICMT      | HLA-C      |         | KIF26A     | RAB3IP  | FUNDC1      |           |            | RBMY3AP   | HDAC5      | FLYWCH1  |
| EIF3G     | THAP12     |         | SLC4A11    | PIP4K2A | COCH        |           |            | TMX1      | SRD5A3     | UBTD1    |
| PROB1     | MFSD3      |         | ZNF768     | PHACTR1 | TCEA3       |           |            | AATF      | NSMCE3     | TEX19    |
| DTX4      | SHISA5     |         | MAGI3      | NUDCD1  | PPP1R26-AS1 |           |            | DNAJC11   | NANOS3     | MEGF8    |
| MUS81     | CCDC9      |         | TAF9B      | FAM13A  | FCGBP       |           |            | EYA3      | TRAPPC9    | EPHX1    |
| ARHGDIB   | B2M        |         | PTPRF      | BYSL    | CBX7        |           |            | MRTO4     | MARCHF9    | KLF13    |
| ZNRD2     | TYMSOS     |         | TCIRG1     | TNFSF10 | ARVCF       |           |            | LRP8      | PPT2       | NCK1     |
| WIPI1     | ACOT8      |         | C4orf50    | GMEB1   | TMEM54      |           |            | MYBBP1A   | JAGN1      | STK33    |
| PFDN1     | NOPCHAP1   |         | CADM1      | DDX21   | CPNE2       |           |            | BNIP1     | KIFC3      | GIHCG    |
| ACY3      | CDC42EP5   |         | NBR1       | RFFL    | CHTF18      |           |            | GNL2      | HMCE5      | RPGRIP1L |
| SRP19     | PGAM1      |         | LMLN       | URB2    | TNFRSF12A   |           |            | FLI1      | SPIN4      | ASB2     |
| CLPTM1L   | PDIA2      |         | RNF183     | USP3    | FIBCD1      |           |            | UBE2D3    | SLC2A8     | SLC38A7  |

| Blue      | Green     | Skyblue | Brown    | Red           | Black      | Yellow | Orange | Indigo  | Grey   | Purple  |
|-----------|-----------|---------|----------|---------------|------------|--------|--------|---------|--------|---------|
| TEKT4P2   | PA2G4     |         | BUB3     | PRKCD         | H4C12      |        |        | ARL6IP5 | PIGS   | GGCT    |
| PTPN23    | RAD54L    |         | TBC1D5   | TRIM25        | ADAMTSL5   |        |        | SP140L  | TMEM53 | H3C10   |
| MILR1     | DOCK2     |         | PLXNA3   | MITD1         | NMU        |        |        | CCDC47  | TPMT   | KAZALD1 |
| ABCG1     | NIPAL3    |         | LDHD     | NFKBIE        | MRM2       |        |        | OGFR    | LASP1  | DYNC1L1 |
| MZB1      | APBB2     |         | CARD11   | NABP1         | PACS2      |        |        | NOL6    |        | PTPN4   |
| SCD       | IFI44L    |         | SRPK2    | MOB3C         | LINC02595  |        |        | EIF2S1  |        | LGALS9C |
| LYPLA2    | EXOSC4    |         | H2BC20P  | PAK11P1       | FBXL22     |        |        | ABCF2   |        | METTL27 |
| RAD9A     | LAPTM5    |         | YPEL2    | TEX261        | KCNH2      |        |        | ZNF124  |        | RTL8C   |
| DPYD      | RHOA      |         | PNPLA8   | THOC1         | CD3E       |        |        | HSH2D   |        | FABP1   |
| ZNF826P   | MAP3K5    |         | C1orf56  | PATL1         | RABL6      |        |        | ZNF35   |        | CGN     |
| GANAB     | FAM86B2   |         | ZYG11B   | AMER1         | ZNF571-AS1 |        |        | CCDC71  |        | DOCK9   |
| LMAN2     | NMI       |         | ZFP90    | NOL9          | SLC44A2    |        |        | ALAS1   |        | CETN2   |
| RAP1A     | SSR2      |         | DSCAM    | MTMR4         | SAPCD2     |        |        | NMNAT1  |        | ALS2    |
| RPL29     | TMEM175   |         | PRKACA   | MIR3142H<br>G | RIMS3      |        |        | STX12   |        | REXO5   |
| NBEAP1    | SLC38A5   |         | MSX1     | ZNF330        | SMARCD3    |        |        | PRKAG2  |        | CBFA2T2 |
| CMTM3     | FADS3     |         | KC6      | MYC           | SH3BP1     |        |        | FAM98A  |        | IRF2BPL |
| FDPS      | NUDT5     |         | DCPS     | DDX58         | RASSF4     |        |        | EIF3J   |        | KIF1B   |
| PABPC4    | LIPE      |         | ITGB1    | SLC11A2       | DDIT3      |        |        | MFAP3   |        | TATDN2  |
| HNRNPUL2  | GCSH      |         | B4GALNT1 | MLLT1         | TFEB       |        |        | RNF31   |        | PFKL    |
| NOC4L     | CADPS2    |         | TTC30A   | IFNB1         | RAB33B-AS1 |        |        | ANKHD1  |        | BIK     |
| RNF144A   | CAV1      |         | TCAF1    | ZBTB17        | BEND6      |        |        | CHUK    |        | DARS2   |
| PUSL1     | TPRKB     |         | TAX1BP1  | EIF4A1        | ZNF75A     |        |        | ACO2    |        | FMNL1   |
| SKP1      | CELF2     |         | SGSM2    | ZNF346        | MSANTD3    |        |        | TXNIP   |        | VGLL4   |
| SPATA24   | MESD      |         | DVL3     | TNFRSF10<br>B | INTS1      |        |        | ZNF622  |        | EPCAM   |
| PGM1      | ATG3      |         | ZNF862   | LYRM4         | LAT2       |        |        | NIP7    |        | WDR19   |
| NHP2      | TRPT1     |         | OGA      | RRP7A         | TSSK6      |        |        | TP53RK  |        | PBXIP1  |
| SMIM4     | IFFO2     |         | DSTYK    | MAK16         | TWSG1      |        |        | TAF7    |        | CRYBB1  |
| LINC01138 | GPATCH11  |         | TRIM59   | NFKBIB        | CNN3-DT    |        |        | CLPB    |        | BEGAIN  |
| PITHD1    | EHD1      |         | ADD3     | PRAG1         | GNRHR2     |        |        | RBM27   |        | FGD3    |
| LZIC      | ZNF740    |         | SNX16    | ZHX2          | RASA2      |        |        | MIER2   |        | WNT7B   |
| MHENCRCR  | CAAP1     |         | PRICKLE3 | G0S2          | AASDH      |        |        | RAB22A  |        | NF2     |
| OTUB1     | SNHG19    |         | ODF2     | ZNF195        | COX18      |        |        | NDUFA9  |        | WASHC5  |
| FGD5      | BEND4     |         | NLRP5    | MGRN1         | ZFTA       |        |        | SEC24C  |        | NAIF1   |
| BTF3L4    | GRPEL2    |         | ATG2A    | BAIAP2L1      | WARS2-AS1  |        |        | RINT1   |        | HSPB8   |
| SRM       | SMARCC1   |         | ARHGAP42 | QTRT2         | MTA1-DT    |        |        | ENTPD1  |        | SCAPER  |
| NDFIP1    | KCNAB1    |         | CLBA1    | NR4A3         | CTSB       |        |        | SPTLC1  |        | UBL3    |
| TM2D3     | LINC01128 |         | ALPK1    | CCNL2         | C5orf34    |        |        | STKLD1  |        | SLC1A5  |
| MACO1     | VAMP8     |         | ATP6V0E2 | SNRNP27       | LYSMD1     |        |        | SF1     |        | AMPD2   |

| Blue        | Green      | Skyblue | Brown    | Red      | Black     | Yellow | Orange | Indigo          | Grey | Purple     |
|-------------|------------|---------|----------|----------|-----------|--------|--------|-----------------|------|------------|
| SF3B2       | RPL36AL    |         | TGFB3    | ZDHHHC21 | ITPKC     |        |        | LINC00519       |      | S100A3     |
| CR2         | SNX5       |         | KHDRBS3  | CILK1    | BBS4      |        |        | SLC25A28        |      | BRK1       |
| CCNG1       | KCNK6      |         | ERI2     | AGPAT5   | FMNL1-DT  |        |        | HSPA8           |      | FLNA       |
| RAB26       | UBE2V1     |         | NPC1     | BAP1     | SH3PXD2A  |        |        | PSMB8-AS1       |      | SPINDOC    |
| CYB5R4      | ATF1       |         | PLEKHG2  | SLC22A23 | SEC61A2   |        |        | C1QL3           |      | SESN2      |
| RACK1       | SRRT       |         | ZEB1-AS1 | PRR3     | LINC02132 |        |        | AASDHPPT        |      | CCDC34     |
| TEX14       | LTO1       |         | TPPP     | FASTKD5  | EML6      |        |        | CDC37L1-DT      |      | UBXN2A     |
| DIAPH1      | UFC1       |         | MPP1     | ZNF620   | PLS1      |        |        | DGUOK-AS1       |      | NDUFA10    |
| HARS1       | POLR2C     |         | MNT      | WNT5B    | SIRT5     |        |        | ANKHD1-EIF4EBP3 |      | BMP1       |
| ENPP4       | ZNF232-AS1 |         | SPC24    | GTPBP4   | MAN1B1-DT |        |        | PORCN-DT        |      | VPS52      |
| CNTF        | TMEM161A   |         | USP9X    | PAICS    | C7orf25   |        |        | C9orf72         |      | MICALL1    |
| ANAPC15     | C1D        |         | CRELD1   | RAB12    | C11orf71  |        |        | PMF1-BGLAP      |      | ZBTB11-AS1 |
| MYOM2       | LRRC41     |         | VSTM4    | CFLAR    | PTS       |        |        |                 |      | PIR        |
| TUSC2       | IFFO1      |         | KAT14    | TERF2    | CFAP298   |        |        |                 |      | FOXJ2      |
| RPS6        | GALNT10    |         | PRDM4    | NOP2     | CTTN      |        |        |                 |      | COBLL1     |
| LDLRAD3     | ERP44      |         | JARID2   | EMSLR    | MNX1      |        |        |                 |      | PXK        |
| FKBP2       | PANK4      |         | CDA      | RGS1     | ENC1      |        |        |                 |      |            |
| RAC2        | IFI35      |         | HPSE     | ZFP36    | HMGB3     |        |        |                 |      |            |
| PNP         | RABEPK     |         | FCER2    | NUP62    | NAGLU     |        |        |                 |      |            |
| DCTN4       | LINC02009  |         | MROH6    | NAV2     | PLPP3     |        |        |                 |      |            |
| CYP51A1     | RPL27A     |         | UROS     | ASPHD2   | FAM222A   |        |        |                 |      |            |
| SELENOK     | SELENOS    |         | SHTN1    | RTCB     | LRRC3     |        |        |                 |      |            |
| NCEH1       | ELP6       |         | BACE2    | CAB39    | PPP6R2    |        |        |                 |      |            |
| KARS1       | VAC14      |         | POC1B    | PLEK     | RAB15     |        |        |                 |      |            |
| ZSCAN16-AS1 | LY6E       |         | PPP2R5C  | GLS      | HBA2      |        |        |                 |      |            |
| LAMTOR1     | IP6K1      |         | TRAF5    | SLC44A5  | MYO5C     |        |        |                 |      |            |
| PSMF1       | HYAL2      |         | POMZP3   | OGFOD1   | BCYRN1    |        |        |                 |      |            |
| CYP2J2      | CHFR       |         | GPAA1    | PLD6     | COG8      |        |        |                 |      |            |
| SYK         | ANXA6      |         | FAM25BP  | OTUD4    | ASRGL1    |        |        |                 |      |            |
| NUDC        | SCAMP2     |         | NBPF3    | UBAP2L   | NDRG4     |        |        |                 |      |            |
| CD99        | PDIA3      |         | KRT83    | PARP14   |           |        |        |                 |      |            |
| TPBG        | CRLF2      |         | PSORS1C1 | SINHCAF  |           |        |        |                 |      |            |
| CHRAC1      | MLX        |         | LCLAT1   | RRP7BP   |           |        |        |                 |      |            |
| CEACAM21    | DMAP1      |         | ERCC6L   | GNL3     |           |        |        |                 |      |            |
| DHX34       | PPP1R11    |         | KRT6B    | ADAP1    |           |        |        |                 |      |            |
| ARPC5       | DNTTIP1    |         | GBE1     | EI24     |           |        |        |                 |      |            |
| ZNF436-AS1  | TRIM27     |         | NGLY1    | SLC16A1  |           |        |        |                 |      |            |
| RSU1        | MAPK9      |         | SEMA4D   | ICE1     |           |        |        |                 |      |            |



| Blue     | Green   | Skyblue | Brown     | Red          | Black | Yellow | Orange | Indigo | Grey | Purple |
|----------|---------|---------|-----------|--------------|-------|--------|--------|--------|------|--------|
| CTNBL1   | FJX1    |         | DTX1      | TMEM39A      |       |        |        |        |      |        |
| DNAH14   | RPL21   |         | PPP1R18   | PLCL2        |       |        |        |        |      |        |
| TMED9    | HERC6   |         | TMEM237   | PFDN2        |       |        |        |        |      |        |
| MRPS12   | GPR89B  |         | UBALD2    | EMSY         |       |        |        |        |      |        |
| SPRED1   | IL17RB  |         | FAM126A   | GABPB1       |       |        |        |        |      |        |
| MLEC     | FAM241A |         | SNTB2     | POLR1B       |       |        |        |        |      |        |
| ALDH1L2  | SHROOM3 |         | ACACB     | PANK2        |       |        |        |        |      |        |
| XK       | NOP58   |         | STXBP5    | RRP12        |       |        |        |        |      |        |
| AAR2     | EEF1B2  |         | EIF3J-DT  | RNF19A       |       |        |        |        |      |        |
| EIF3I    | DUS1L   |         | ZDHC20    | UTP15        |       |        |        |        |      |        |
| SEC61A1  | MGST1   |         | EIF4E3    | DCAF13       |       |        |        |        |      |        |
| GLT8D1   | SNRPD1  |         | SMAP1     | PRMT1        |       |        |        |        |      |        |
| GASK1A   | RPP30   |         | CPPED1    | PTPN2        |       |        |        |        |      |        |
| MPHOSPH6 | PSMB10  |         | H2AC6     | DGKE         |       |        |        |        |      |        |
| TCAIM    | RTRAF   |         | SELENOW   | TCF4         |       |        |        |        |      |        |
| PSME1    | ARSA    |         | LINC00052 | PPARGC1<br>B |       |        |        |        |      |        |
| UTP4     | PDIA5   |         | MAST3     | RFX5         |       |        |        |        |      |        |
| TM9SF3   | KPNA1   |         | ANLN      | OASL         |       |        |        |        |      |        |
| PNO1     | NRDC    |         | ENDOV     | SH2D4A       |       |        |        |        |      |        |
| ARHGDI1A | IRF7    |         | PEX11A    | DIP2B        |       |        |        |        |      |        |
| TMED5    | NDC1    |         | ARHGEF9   | NFKBID       |       |        |        |        |      |        |
| MPDU1    | RNF125  |         | AGGF1     | SNX11        |       |        |        |        |      |        |
| ITGB7    | ITGAL   |         | TBC1D14   | MTF1         |       |        |        |        |      |        |
| NUDCD2   | UROD    |         | LINC01278 | ING3         |       |        |        |        |      |        |
| FTSJ3    | MRS2    |         | SMARCC2   | MAML1        |       |        |        |        |      |        |
| VKORC1L1 | UBLCP1  |         | TNRC6B    | TRIM21       |       |        |        |        |      |        |
| CGREF1   | RPL37   |         | PALD1     | KLHL18       |       |        |        |        |      |        |
| TRAM1    | CDK11B  |         | TMEM178B  | FARS2        |       |        |        |        |      |        |
| SMIM12   | RRS1    |         | DLGAP4    | RASA1        |       |        |        |        |      |        |
| RRP9     | STEAP3  |         | TRAPPC13  | PGAM5        |       |        |        |        |      |        |
| STOML2   | OPN3    |         | PLXNA2    | PPP2R1B      |       |        |        |        |      |        |
| ORMDL1   | DENND2D |         | NIPA1     | GMFB         |       |        |        |        |      |        |
| SNIP1    | TAPBPL  |         | TTC28-AS1 | ANKRD40      |       |        |        |        |      |        |
| VCP      | PSMA5   |         | FGFRL1    | DTX3L        |       |        |        |        |      |        |
| TUT1     | SLC35E1 |         | ZNF829    | MAP4         |       |        |        |        |      |        |
| MTFP1    | CCDC138 |         | MAPK13    | PSME3        |       |        |        |        |      |        |
| EMC7     | RBCK1   |         | PPM1B     | TNIP2        |       |        |        |        |      |        |
| CASP1    | CNOT8   |         | WASF1     | PDSS1        |       |        |        |        |      |        |

| Blue    | Green     | Skyblue | Brown    | Red        | Black | Yellow | Orange | Indigo | Grey | Purple |
|---------|-----------|---------|----------|------------|-------|--------|--------|--------|------|--------|
| MTG2    | PISD      |         | HNRNPLL  | ZNFX1      |       |        |        |        |      |        |
| PRPF19  | ZW10      |         | ITPKB    | TRIM26     |       |        |        |        |      |        |
| NT5DC2  | GLCE      |         | SEMA4B   | HOOK1      |       |        |        |        |      |        |
| SLC35F4 | MVD       |         | CDCA7L   | RPRD1B     |       |        |        |        |      |        |
| TPK1    | EIF3K     |         | NUF2     | IFI16      |       |        |        |        |      |        |
| ERI3    | BCS1L     |         | SNHG20   | NCL        |       |        |        |        |      |        |
| ATPAF1  | RBFOX2    |         | DHRS2    | MRTFA      |       |        |        |        |      |        |
| HSBP1   | RCHY1     |         | REPS2    | ZNF506     |       |        |        |        |      |        |
| FEN1    | BHLHA15   |         | TMEM106B | TIFA       |       |        |        |        |      |        |
| TMED7   | DYNLT3    |         | PXN      | IFIH1      |       |        |        |        |      |        |
| ATP1A3  | SNORD3B-1 |         | ARL6IP1  | KCTD12     |       |        |        |        |      |        |
| NANP    | AK3       |         | RNF13    | SMOX       |       |        |        |        |      |        |
| EIF3M   | CDC42     |         | ABCA2    | IMP4       |       |        |        |        |      |        |
| CRNKL1  | THTPA     |         | BUB1     | CCND2      |       |        |        |        |      |        |
| MON1A   | CAMKK2    |         | GLIS2    | RPUSD4     |       |        |        |        |      |        |
| SPCS3   | NDUFS6    |         | H2BC8    | RAB24      |       |        |        |        |      |        |
| KIF9    | HSPE1     |         | ETV5     | SPATA2     |       |        |        |        |      |        |
| EIF1AD  | SPRYD3    |         | PPP2R5A  | RND1       |       |        |        |        |      |        |
| MKNK1   | LMNB1     |         | STRBP    | ZNF430     |       |        |        |        |      |        |
| ANO10   | NDUFB3    |         | TMEM63C  | WAKMAR2    |       |        |        |        |      |        |
| SHISA4  | IRF1-AS1  |         | ADCY6    | ARPP19     |       |        |        |        |      |        |
| PDIA6   | UQCRH     |         | STXBP1   | DSE        |       |        |        |        |      |        |
| CNTNAP3 | CUTC      |         | COA1     | GBP3       |       |        |        |        |      |        |
| FCHSD1  | RTN2      |         | PKNOX1   | IPO7       |       |        |        |        |      |        |
| DCAKD   | RPL38     |         | POMT1    | SLCO5A1    |       |        |        |        |      |        |
| INTS4   | DRAP1     |         |          | SMG5       |       |        |        |        |      |        |
| SULT1A1 | NSUN5     |         |          | RIOK1      |       |        |        |        |      |        |
| SPRY4   | ZDHHC3    |         |          | NUP153-AS1 |       |        |        |        |      |        |
| CCNC    | INTS11    |         |          | STX11      |       |        |        |        |      |        |
| PEX14   | SMYD5     |         |          | EIF4G2     |       |        |        |        |      |        |
| GNG5    | CCDC187   |         |          | ELOVL7     |       |        |        |        |      |        |
| TAF9    | SNRNP70   |         |          | ZNF670     |       |        |        |        |      |        |
| WDR74   | C5orf15   |         |          | SGTB       |       |        |        |        |      |        |
| NACA    | POLD4     |         |          | NR1D2      |       |        |        |        |      |        |
| EMC8    | CAMLG     |         |          | NXF1       |       |        |        |        |      |        |
| TRIT1   | TIGD2     |         |          | MAFF       |       |        |        |        |      |        |
| PAQR7   | MAN2A1    |         |          | SNHG1      |       |        |        |        |      |        |
| SRA1    | RAE1      |         |          | CRIM1      |       |        |        |        |      |        |

| Blue      | Green      | Skyblue | Brown | Red     | Black | Yellow | Orange | Indigo | Grey | Purple |
|-----------|------------|---------|-------|---------|-------|--------|--------|--------|------|--------|
| ZNF682    | GSTO1      |         |       | TAP1    |       |        |        |        |      |        |
| MTUS1     | QDPR       |         |       | GRAMD2B |       |        |        |        |      |        |
| PSMA3     | UBE2N      |         |       | FANCL   |       |        |        |        |      |        |
| AHCY      | EMB        |         |       | TMA16   |       |        |        |        |      |        |
| EXO5      | SDHAF2     |         |       | EML4    |       |        |        |        |      |        |
| EVI2A     | MRPL4      |         |       | HNRNPK  |       |        |        |        |      |        |
| POLR1H    | CSTF3      |         |       | DENR    |       |        |        |        |      |        |
| RMDN3     | RAB6A      |         |       | NAA15   |       |        |        |        |      |        |
| PIGO      | NAA80      |         |       | PLAGL2  |       |        |        |        |      |        |
| WASF2     | SLC10A7    |         |       | ZNF492  |       |        |        |        |      |        |
| MUL1      | PURA       |         |       | METTL2B |       |        |        |        |      |        |
| POLR3H    | ALG1       |         |       | CYLD    |       |        |        |        |      |        |
| GSTK1     | FAM27B     |         |       | CCL5    |       |        |        |        |      |        |
| SYS1      | ZNF408     |         |       | DHX16   |       |        |        |        |      |        |
| IDI1      | MRPS23     |         |       | SMURF1  |       |        |        |        |      |        |
| TRPC4AP   | SIL1       |         |       | ASNSD1  |       |        |        |        |      |        |
| SIRT2     | SIRT6      |         |       | MMACHC  |       |        |        |        |      |        |
| SF3A1     | ACADM      |         |       | TRAFD1  |       |        |        |        |      |        |
| RSAD1     | BMPR2      |         |       | HDAC2   |       |        |        |        |      |        |
| EIF2B2    | MRPL24     |         |       | AGFG1   |       |        |        |        |      |        |
| ALDH18A1  | CYB5RL     |         |       | HIVEP1  |       |        |        |        |      |        |
| RANBP6    | DNAJC8     |         |       | ICAM2   |       |        |        |        |      |        |
| LINC01358 | SNHG8      |         |       | IPO5    |       |        |        |        |      |        |
| TRIM7-AS2 | NARS2      |         |       | WDR12   |       |        |        |        |      |        |
| UBIAD1    | CKS2       |         |       | IMPA1   |       |        |        |        |      |        |
| GPATCH3   | CUEDC2     |         |       | SLC39A1 |       |        |        |        |      |        |
| SGF29     | TMCO1      |         |       | UBE2V2  |       |        |        |        |      |        |
| GTF2B     | IVNS1ABP   |         |       | POLR3A  |       |        |        |        |      |        |
| DDN-AS1   | ATF5       |         |       | PHLPP1  |       |        |        |        |      |        |
| ZNF593    | ATP5IF1    |         |       | YARS2   |       |        |        |        |      |        |
| RPS8      | GON7       |         |       | PCNX3   |       |        |        |        |      |        |
| ZFYVE9    | ZNF433-AS1 |         |       | NEK4    |       |        |        |        |      |        |
| CACNA2D3  | SACS       |         |       | MACC1   |       |        |        |        |      |        |
| CCDC163   | TMEM97     |         |       | RBM6    |       |        |        |        |      |        |
| MTMR8     | PURPL      |         |       | MTOR    |       |        |        |        |      |        |
| BIN2      | SF3A2      |         |       | TRIM69  |       |        |        |        |      |        |
| STT3A     | MLLT10     |         |       | MAT2A   |       |        |        |        |      |        |
| MAPRE1    | PSMA7      |         |       | GPBP1   |       |        |        |        |      |        |

| Blue        | Green    | Skyblue | Brown | Red          | Black | Yellow | Orange | Indigo | Grey | Purple |
|-------------|----------|---------|-------|--------------|-------|--------|--------|--------|------|--------|
| KRT10-AS1   | DCTN3    |         |       | CLUHP3       |       |        |        |        |      |        |
| TXNL1       | FABP5    |         |       | CSNK1A1      |       |        |        |        |      |        |
| SLC22A5     | ODC1     |         |       | TOMM70       |       |        |        |        |      |        |
| PHYKPL      | ACACA    |         |       | TMEM120<br>B |       |        |        |        |      |        |
| EMC1-AS1    | SAR1A    |         |       | CPEB3        |       |        |        |        |      |        |
| DNAJC3      | AKAP8L   |         |       | PEAK1        |       |        |        |        |      |        |
| FXYD5       | PLA2G4A  |         |       | MCTP1        |       |        |        |        |      |        |
| CISD2       | TMEM126A |         |       | BNIP2        |       |        |        |        |      |        |
| C5orf63     | GNB1L    |         |       | NOC3L        |       |        |        |        |      |        |
| HLA-DOB     | SMARCD1  |         |       | SLC9A8       |       |        |        |        |      |        |
| ASAH2B      | TCP1     |         |       | RNF19B       |       |        |        |        |      |        |
| IFITM2      | MRPL14   |         |       | CDK17        |       |        |        |        |      |        |
| C5orf24     | MT1X     |         |       | CSF2RB       |       |        |        |        |      |        |
| PNOC        | CALU     |         |       | SPTY2D1      |       |        |        |        |      |        |
| LINC01531   | RGS19    |         |       | CCDC59       |       |        |        |        |      |        |
| SF3B5       | CYP20A1  |         |       | SRRM1        |       |        |        |        |      |        |
| ERO1B       | ARF1     |         |       | SFMBT2       |       |        |        |        |      |        |
| C11orf98    |          |         |       | ST8SIA4      |       |        |        |        |      |        |
| HM13        |          |         |       | CCDC66       |       |        |        |        |      |        |
| NETO1-DT    |          |         |       | TVP23B       |       |        |        |        |      |        |
| GAREM1      |          |         |       | ENTPD1-AS1   |       |        |        |        |      |        |
| M6PR        |          |         |       | PBRM1        |       |        |        |        |      |        |
| EIF6        |          |         |       | FAM210A      |       |        |        |        |      |        |
| UCHL3       |          |         |       | TANK         |       |        |        |        |      |        |
| CDH18       |          |         |       | NAGK         |       |        |        |        |      |        |
| TBL2        |          |         |       | EML2-AS1     |       |        |        |        |      |        |
| SMIM27      |          |         |       | SDC4         |       |        |        |        |      |        |
| SLC2A1      |          |         |       | CSGALNACT1   |       |        |        |        |      |        |
| NRBP2       |          |         |       | LACTB        |       |        |        |        |      |        |
| CHI3L2      |          |         |       | PLEKHM2      |       |        |        |        |      |        |
| SLC8A1-AS1  |          |         |       | XRN2         |       |        |        |        |      |        |
| TMEM80      |          |         |       | MRPS11       |       |        |        |        |      |        |
| ERCC6L2-AS1 |          |         |       | IGHMBP2      |       |        |        |        |      |        |
| EMBP1       |          |         |       | THUMP2       |       |        |        |        |      |        |
| EEF1A1      |          |         |       | SLC2A6       |       |        |        |        |      |        |
| CSTF1       |          |         |       | NLRP7        |       |        |        |        |      |        |
| PIGL        |          |         |       | COPS2        |       |        |        |        |      |        |
| ALOX5AP     |          |         |       | SDAD1        |       |        |        |        |      |        |

| Blue      | Green | Skyblue | Brown | Red     | Black | Yellow | Orange | Indigo | Grey | Purple |
|-----------|-------|---------|-------|---------|-------|--------|--------|--------|------|--------|
| MIR4500HG |       |         |       | TIMM23  |       |        |        |        |      |        |
| BATF3     |       |         |       | LPIN1   |       |        |        |        |      |        |
| ZNF341    |       |         |       | EDC4    |       |        |        |        |      |        |
|           |       |         |       | KLF5    |       |        |        |        |      |        |
|           |       |         |       | PTP4A1  |       |        |        |        |      |        |
|           |       |         |       | E2F3    |       |        |        |        |      |        |
|           |       |         |       | UMPS    |       |        |        |        |      |        |
|           |       |         |       | RNGTT   |       |        |        |        |      |        |
|           |       |         |       | NOCT    |       |        |        |        |      |        |
|           |       |         |       | ELL     |       |        |        |        |      |        |
|           |       |         |       | ITPRID2 |       |        |        |        |      |        |
|           |       |         |       | STEAP1B |       |        |        |        |      |        |
|           |       |         |       | THADA   |       |        |        |        |      |        |
|           |       |         |       | ZNF268  |       |        |        |        |      |        |
|           |       |         |       | HEATR1  |       |        |        |        |      |        |
|           |       |         |       | SLC7A6  |       |        |        |        |      |        |
|           |       |         |       | ATP2A2  |       |        |        |        |      |        |
|           |       |         |       | GRINA   |       |        |        |        |      |        |
|           |       |         |       | HLA-DRA |       |        |        |        |      |        |
|           |       |         |       | TOM1L1  |       |        |        |        |      |        |
|           |       |         |       | AEN     |       |        |        |        |      |        |
|           |       |         |       | MITF    |       |        |        |        |      |        |
|           |       |         |       | ZNF669  |       |        |        |        |      |        |
|           |       |         |       | MIS12   |       |        |        |        |      |        |
|           |       |         |       | NOB1    |       |        |        |        |      |        |
|           |       |         |       | NOP56   |       |        |        |        |      |        |
|           |       |         |       | PPM1F   |       |        |        |        |      |        |
|           |       |         |       | KCMF1   |       |        |        |        |      |        |
|           |       |         |       | RPS6KC1 |       |        |        |        |      |        |
|           |       |         |       | RRP15   |       |        |        |        |      |        |
|           |       |         |       | SETD2   |       |        |        |        |      |        |
|           |       |         |       | PROX1   |       |        |        |        |      |        |
|           |       |         |       | LSM12   |       |        |        |        |      |        |
|           |       |         |       | SAMD9L  |       |        |        |        |      |        |
|           |       |         |       | ZFYVE27 |       |        |        |        |      |        |
|           |       |         |       | PEA15   |       |        |        |        |      |        |
|           |       |         |       | TDG     |       |        |        |        |      |        |
|           |       |         |       | SUPV3L1 |       |        |        |        |      |        |

| Blue | Green | Skyblue | Brown | Red    | Black | Yellow | Orange | Indigo | Grey | Purple |
|------|-------|---------|-------|--------|-------|--------|--------|--------|------|--------|
|      |       |         |       | IPPK   |       |        |        |        |      |        |
|      |       |         |       | NOTCH2 |       |        |        |        |      |        |
|      |       |         |       | RBM39  |       |        |        |        |      |        |
|      |       |         |       | NOLC1  |       |        |        |        |      |        |

**Supplemental Table 3. GSEA using KEGG pathways of the differentially expressed genes between control and STAT1 KO MM cells stimulated with HAPLN1 matrikine.**

| <i>Term</i>                                                | <i>Pathway Genes</i> | <i>Overlap</i> | <i>raw p</i> | <i>adjusted p</i> | <i>Score</i> |
|------------------------------------------------------------|----------------------|----------------|--------------|-------------------|--------------|
| CYTOKINE_CYTOKINE_RECEPTOR_INTERACTION                     | 106                  | 29             | 4.5648E-15   | 7.8058E-13        | 12.1411937   |
| TOLL_LIKE_RECEPTOR_SIGNALING_PATHWAY                       | 71                   | 18             | 2.8936E-09   | 2.474E-07         | 6.66106492   |
| RIG_I_LIKE_RECEPTOR_SIGNALING_PATHWAY                      | 52                   | 13             | 5.5596E-07   | 2.3767E-05        | 4.69944011   |
| CYTOSOLIC_DNA_SENSING_PATHWAY                              | 36                   | 11             | 4.5994E-07   | 2.6217E-05        | 4.68053052   |
| <b>CHEMOKINE_SIGNALING_PATHWAY</b>                         | 118                  | 19             | 2.3072E-06   | 7.8905E-05        | 4.14671407   |
| <b>JAK_STAT_SIGNALING_PATHWAY</b>                          | 82                   | 14             | 2.4955E-05   | 0.00071121        | 3.21022545   |
| NOD_LIKE_RECEPTOR_SIGNALING_PATHWAY                        | 46                   | 10             | 4.2673E-05   | 0.00104244        | 3.07657261   |
| INTESTINAL_IMMUNE_NETWORK_FOR_IGA_PRODUCTION               | 19                   | 6              | 0.00016821   | 0.00359558        | 2.6316797    |
| SMALL_CELL_LUNG_CANCER                                     | 64                   | 11             | 0.00017205   | 0.00326898        | 2.56435872   |
| ALLOGRAFT_REJECTION                                        | 16                   | 5              | 0.00063794   | 0.009917          | 2.22524833   |
| APOPTOSIS                                                  | 71                   | 11             | 0.00044007   | 0.00752525        | 2.20036175   |
| SYSTEMIC_LUPUS_ERYTHEMATOSUS                               | 17                   | 5              | 0.00086909   | 0.01238452        | 2.12191889   |
| LEISHMANIA_INFECTION                                       | 44                   | 8              | 0.00089543   | 0.01177834        | 2.03828143   |
| HEMATOPOIETIC_CELL_LINEAGE                                 | 36                   | 7              | 0.0012374    | 0.01410632        | 1.97647153   |
| ADIPOCYTOKINE_SIGNALING_PATHWAY                            | 46                   | 8              | 0.00121395   | 0.01482748        | 1.93607636   |
| VIRAL_MYOCARDITIS                                          | 38                   | 7              | 0.00172471   | 0.01638476        | 1.90539386   |
| P53_SIGNALING_PATHWAY                                      | 59                   | 9              | 0.00160886   | 0.01618322        | 1.87867419   |
| NATURAL_KILLER_CELL_MEDIATED_CYTOTOXICITY                  | 70                   | 10             | 0.0015093    | 0.01613064        | 1.87031887   |
| AUTOIMMUNE_THYROID_DISEASE                                 | 15                   | 4              | 0.00434874   | 0.03913866        | 1.65481458   |
| PATHWAYS_IN_CANCER                                         | 220                  | 20             | 0.00528655   | 0.04519997        | 1.38127202   |
| TYPE_II_DIABETES_MELLITUS                                  | 27                   | 5              | 0.00769      | 0.06261854        | 1.37563393   |
| PRIMARY_IMMUNODEFICIENCY                                   | 19                   | 4              | 0.01063853   | 0.07909513        | 1.32482362   |
| B_CELL_RECEPTOR_SIGNALING_PATHWAY                          | 62                   | 8              | 0.00816474   | 0.06346227        | 1.29082058   |
| CHRONIC_MYELOID_LEUKEMIA                                   | 65                   | 8              | 0.01078747   | 0.07686071        | 1.204873     |
| <b>CELL_ADHESION_MOLECULES_CAMS</b>                        | 68                   | 8              | 0.01398645   | 0.09566734        | 1.10855068   |
| ACUTE_MYELOID_LEUKEMIA                                     | 47                   | 6              | 0.02190413   | 0.13872619        | 0.98083187   |
| TYPE_I_DIABETES_MELLITUS                                   | 16                   | 3              | 0.03659446   | 0.19555165        | 0.97674503   |
| NOTCH_SIGNALING_PATHWAY                                    | 37                   | 5              | 0.02830947   | 0.16692828        | 0.92630213   |
| GLYCOSAMINOGLYCAN_BIOSYNTHESIS_CHONDROITIN_SULFATE         | 18                   | 3              | 0.04977049   | 0.23640985        | 0.87421199   |
| NEUROTROPHIN_SIGNALING_PATHWAY                             | 100                  | 10             | 0.02686156   | 0.16404738        | 0.86246399   |
| EPITHELIAL_CELL_SIGNALING_IN_HELICOBACTER_PYLORI_INFECTION | 53                   | 6              | 0.0370699    | 0.19208946        | 0.82850686   |
| T_CELL_RECEPTOR_SIGNALING_PATHWAY                          | 79                   | 8              | 0.03165908   | 0.18045676        | 0.82723984   |
| MELANOMA                                                   | 42                   | 5              | 0.04571426   | 0.22334681        | 0.78594642   |
| PROSTATE_CANCER                                            | 69                   | 7              | 0.04260001   | 0.21425298        | 0.7611339    |

## Supplemental References

1. De Bakshi D, Chen Y-C, Wuerzberger-Davis SM, et al. Ectopic CH60 mediates HAPLN1-induced cell survival signaling in multiple myeloma. *Life Science Alliance*. 2023;6(3):e202201636.
2. Huynh M, Pak C, Markovina S, et al. Hyaluronan and proteoglycan link protein 1 (HAPLN1) activates bortezomib-resistant NF- $\kappa$ B activity and increases drug resistance in multiple myeloma. *Journal of Biological Chemistry*. 2018;293(7):2452-2465.
3. Jung O, Trapp-Stamborski V, Purushothaman A, et al. Heparanase-induced shedding of syndecan-1/CD138 in myeloma and endothelial cells activates VEGFR2 and an invasive phenotype: prevention by novel synstatins. *Oncogenesis*. 2016;5(2):e202-e202.
4. Zengel P, Nguyen-Hoang A, Schildhammer C, Zantl R, Kahl V, Horn E.  $\mu$ -Slide Chemotaxis: a new chamber for long-term chemotaxis studies. *BMC cell biology*. 2011;12(1):21-14.
5. Tomasova L, Guttenberg Z, Hoffmann B, Merkel R. Advanced 2D/3D cell migration assay for faster evaluation of chemotaxis of slow-moving cells. *PloS one*. 2019;14(7):e0219708.
6. Markovina S, Callander NS, O'Connor SL, et al. Bortezomib-resistant nuclear factor-kappaB activity in multiple myeloma cells. *Molecular cancer research : MCR*. 2008;6(8):1356-1364.



7. O'Connor S, Shumway SD, Amanna IJ, Hayes CE, Miyamoto S. Regulation of constitutive p50/c-Rel activity via proteasome inhibitor-resistant I $\kappa$ B $\alpha$  degradation in B cells. *Mol Cell Biol*. 2004;24(11):4895-4908.
8. Runnels JM, Carlson AL, Pitsillides C, et al. Optical techniques for tracking multiple myeloma engraftment, growth, and response to therapy. *Journal of biomedical optics*. 2011;16(1):011006.
9. Chen Z, Orlowski RZ, Wang M, Kwak L, McCarty N. Osteoblastic niche supports the growth of quiescent multiple myeloma cells. *Blood*. 2014;123(14):2204-2208.
10. Lwin ST, Edwards CM, Silbermann R. Preclinical animal models of multiple myeloma. *BoneKEy reports*. 2016;5:772.
11. Campeau E, Ruhl VE, Rodier F, et al. A versatile viral system for expression and depletion of proteins in mammalian cells. *PLoS one*. 2009;4(8):e6529.
12. Caeser R, Di Re M, Krupka JA, et al. Genetic modification of primary human B cells to model high-grade lymphoma. *Nat Commun*. 2019;10(1):4543.
13. Huynh M, Chang HY, Lisiero DN, et al. HAPLN1 confers multiple myeloma cell resistance to several classes of therapeutic drugs. *PLoS One*. 2022;17(12):e0274704.
14. Roopra A. MAGIC: A tool for predicting transcription factors and cofactors driving gene sets using ENCODE data. *PLoS computational biology*. 2020;16(4):e1007800.
15. Love MI, Huber W, Anders S. Moderated estimation of fold change and dispersion for RNA-seq data with DESeq2. *Genome Biol*. 2014;15(12):550.
16. Traag VA, Waltman L, van Eck NJ. From Louvain to Leiden: guaranteeing well-connected communities. *Sci Rep*. 2019;9(1):5233.

17. Blondel VD, Guillaume J-L, Lambiotte R, Lefebvre E. Fast unfolding of communities in large networks. *Journal of Statistical Mechanics: Theory and Experiment*. 2008;2008(10):P10008.
